1 **Glutamine supports the protection of tissue cells against the damage caused**  
2 **by cholesterol-dependent cytolysins from pathogenic bacteria**

3

4 **Short title: Glutamine supports cytoprotection against cytolysins**

5

6

7 Matthew L. Turner<sup>1</sup>, Sian E. Owens<sup>1</sup>, I. Martin Sheldon<sup>1\*</sup>

8

9 <sup>1</sup> Institute of Life Science, Swansea University Medical School, Swansea University,  
10 Swansea, United Kingdom

11

12

13 \* Corresponding author

14 E-mail: [i.m.sheldon@swansea.ac.uk](mailto:i.m.sheldon@swansea.ac.uk)

15

16

17

18

19

20

## 21 **Abstract**

22 Pathogenic bacteria often damage tissues by secreting toxins that form pores  
23 in cell membranes, and the most common pore-forming toxins are cholesterol-  
24 dependent cytolysins. During bacterial infections, glutamine becomes a conditionally  
25 essential amino acid, and glutamine is an important nutrient for immune cells.  
26 However, the role of glutamine in protecting tissue cells against pore-forming toxins  
27 is unclear. Here we tested the hypothesis that glutamine supports the protection of  
28 tissue cells against the damage caused by cholesterol-dependent cytolysins. Stromal  
29 and epithelial cells were sensitive to damage by cholesterol-dependent cytolysins,  
30 pyolysin and streptolysin O, as determined by leakage of potassium and lactate  
31 dehydrogenase from cells, and reduced cell viability. However, glutamine helped  
32 protect cells against cholesterol-dependent cytolysins because glutamine deprivation  
33 increased the leakage of lactate dehydrogenase and reduced the viability of cells  
34 challenged with cytolysins. Without glutamine, stromal cells challenged with pyolysin  
35 leaked lactate dehydrogenase (control vs. pyolysin,  $2.6 \pm 0.6$  vs.  $34.4 \pm 4.5$  AU,  $n =$   
36 12), which was more than three-fold the leakage from cells supplied with 2 mM  
37 glutamine (control vs. pyolysin,  $2.2 \pm 0.3$  vs.  $9.4 \pm 1.0$  AU). The cytoprotective effect  
38 of glutamine was not dependent on glutaminolysis, replenishing the Krebs cycle via  
39 succinate, changes in cellular cholesterol, or regulators of cell metabolism (AMPK  
40 and mTOR). In conclusion, although the mechanism remains elusive, we found that  
41 glutamine supports the protection of tissue cells against the damage caused by  
42 cholesterol-dependent cytolysins from pathogenic bacteria.

43

44

## 45 **Introduction**

46           Animals defend themselves against bacterial infections using the  
47 complimentary strategies of resistance and tolerance [1-3]. Resistance is the ability  
48 to limit the pathogen burden, usually by employing the immune system to kill  
49 bacteria. Tolerance is the ability to limit the severity of disease caused by a given  
50 pathogen burden, usually by limiting the damage caused by bacteria. Bacteria often  
51 damage tissue cells by secreting toxins that form pores in the cell membrane, and  
52 the most common pore-forming toxins are cholesterol-dependent cytolysins [4-7].  
53 During bacterial infections, the cells of the immune system use glutamine as a key  
54 nutrient to support inflammatory responses [8-10]. However, the role of glutamine in  
55 protecting tissue cells against the damage caused by cholesterol-dependent  
56 cytolysins is unclear.

57           Cholesterol-dependent cytolysins include pyolysin secreted by *Trueperella*  
58 *pyogenes*, which causes purulent infections in cattle and swine, such as postpartum  
59 uterine disease and abscesses, and streptolysin O (SLO) secreted by beta-hemolytic  
60 group A *Streptococci*, which causes pharyngitis and impetigo in children [11-14].  
61 These cytolysins bind cholesterol-rich areas in tissue cell membranes, where they  
62 form 30 nm diameter pores. The membrane pores lead to leakage of potassium ions  
63 from cells within minutes, and further cell damage is evidenced by leakage of  
64 proteins, such as lactate dehydrogenase (LDH), from the cytoplasm and ultimately  
65 cell death [6, 15]. Tissue cells counter the damage by activating stress responses  
66 and transitioning to a quiescent metabolic state [5, 6]. The effect of metabolism on  
67 cytoprotection against cholesterol-dependent cytolysins is largely unexplored.  
68 However, an intriguing observation is that the metabolic stress of lactation in dairy

69 cattle increases the risk of postpartum uterine disease associated with *T. pyogenes*  
70 [16-19], probably by impairing the ability of the endometrial tissue to tolerate the  
71 presence of bacteria [20]. We therefore proposed that the availability of nutrients  
72 might affect the ability of tissue cells to protect themselves against cholesterol-  
73 dependent cytolytins.

74 Cells use glucose and glutamine to supply most of their energy [21-23].  
75 Glycolysis converts glucose to pyruvate to feed the Krebs cycle, whilst glutaminase  
76 converts glutamine to glutamate to replenish the Krebs cycle [9, 24]. Glutamine is an  
77 abundant non-essential amino acid, with about 0.7 mM glutamine in human  
78 peripheral plasma and 0.25 mM in bovine plasma [8, 25]. However, glutamine  
79 becomes a conditionally essential amino acid after injury or infection, and glutamine  
80 fosters immune cell inflammatory responses [8, 9, 26, 27]. As glutamine is a key  
81 nutrient, our aim was to test the hypothesis that glutamine supports the protection of  
82 tissue cells against the damage caused by cholesterol-dependent cytolytins.

83

## 84 **Results**

### 85 **Pyolysin damages stromal cells**

86 We used primary bovine endometrial stromal cells and pyolysin to study  
87 cytoprotection because these tissue cells are the principal target for pyolysin [14];  
88 and, unlike other cholesterol-dependent cytolytins, pyolysin does not require thiol-  
89 activation [13]. Pyolysin formed pores in the stromal cells, as determined by the loss  
90 of intracellular potassium within 5 min (Fig 1A). Furthermore, a 2 h challenge with  
91 pyolysin damaged the stromal cells, as determined by reduced cell viability (Fig 1B)

92 and leakage of lactate dehydrogenase (LDH) from the cytosol into cell supernatants  
93 (Fig 1C). We chose a 2 h pyolysin challenge based on previous kinetic studies where  
94 50% of endometrial stromal cells were perforated after 2 h [14]. Furthermore, the 2 h  
95 challenge reduces the likelihood of confounding cell protection with immune  
96 responses to cytolytins, which are usually evident after 2 h in immune cells [28].

97

98 **Fig 1. Cytolytic activity of pyolysin.** (A) Bovine endometrial stromal cells were  
99 challenged for 5 min with control serum-free medium (●) or medium containing  
100 pyolysin (●), and potassium was measured in cell lysates. Data are presented using  
101 cells from 3 animals and the horizontal line represents the mean; data were analyzed  
102 by t-test. (B, C) Stromal cells were challenged for 2 h with control serum-free  
103 medium (■) or medium with the indicated concentrations of pyolysin (■); cell viability  
104 was determined by MTT assay (B) and LDH leakage evaluated by measuring LDH in  
105 the cell supernatants (C). Data are presented as mean (SEM) using cells from 4  
106 animals; data were analyzed by ANOVA and P values are reported.

107

### 108 **Glutamine supports stromal cell protection against pyolysin**

109 Cells are usually cultured in media containing 2 mM glutamine, which is eight  
110 fold higher than the plasma concentration of glutamine in cows [25]. To examine if  
111 the availability of glutamine affected cytoprotection against pyolysin, we cultured  
112 stromal cells for 24 h in serum-free media containing an excess of glucose (11.1  
113 mM) with a range of concentrations of glutamine (0 to 2 mM), and then challenged  
114 the cells for 2 h with control medium or 10 HU/well pyolysin. We used serum-free  
115 medium because cholesterol in serum can bind cholesterol-dependent cytolytins,

116 and to limit glutamine-dependent differences in cell growth. Irrespective of glutamine  
117 availability, pyolysin caused pore formation, as determined by loss of intracellular  
118 potassium within 5 min (Fig 2A; two-way ANOVA,  $n = 3$  animals,  $P < 0.001$ ). We next  
119 evaluated the effect of glutamine on pyolysin-induced cell damage by determining  
120 the leakage of LDH into cell supernatants. We did not use the mitochondrial-  
121 dependent MTT assay for cell viability here because differences in glutamine  
122 availability affect cell growth and mitochondrial function [8]. Furthermore, to account  
123 for differences in cell growth, we measured cellular DNA at the end of each  
124 experiment and normalized the leakage of LDH into cell supernatants using the  
125 control-challenge cells. Limiting the availability of glutamine increased the  
126 accumulation of LDH in supernatants when cells were challenged with pyolysin (Fig  
127 2B; two-way ANOVA;  $n = 4$  animals,  $P < 0.001$ ). The increased leakage of LDH in  
128 stromal cells cultured without glutamine, compared with 2 mM glutamine, was  
129 evident from 15 min after pyolysin challenge (Fig 2C). When cells were examined by  
130 light microscopy, cells cultured with 2 mM glutamine and challenged with pyolysin  
131 showed some damage but usually maintained defined cell boundaries, whereas  
132 most cells were misshapen if they were deprived of glutamine and challenged with  
133 pyolysin (Fig 2D). Staining actin with phalloidin also showed that when challenged  
134 with pyolysin the cytoskeletal was more disrupted in cells deprived of glutamine than  
135 cells cultured with glutamine (Fig 2E). Finally, as primary cells often vary in their  
136 biological response, we verified our observations using stromal cells collected from  
137 12 independent animals; cells cultured without glutamine leaked more than three  
138 times the LDH from cells supplied with 2 mM glutamine (Fig 2F).

139

140 **Fig 2. Glutamine is cytoprotective against pyolysin.** (A) Bovine endometrial  
141 stromal cells were cultured for 24 h in medium containing 2 mM glutamine (2) or  
142 without glutamine (0), and challenged for 5 min with control medium (●) or pyolysin  
143 (●). Intracellular potassium was determined by flame photometry. Data are from 3  
144 animals, with a horizontal line indicating the mean. (B) Cells were cultured in medium  
145 containing the indicated concentrations of glutamine for 24 h, and challenged for 2 h  
146 with control medium (●) or 10 HU pyolysin (●), and LDH measured in supernatants  
147 and normalized to cellular DNA in the control challenge. Data are mean (SEM) of 4  
148 animals, analyzed by ANOVA with Dunnett's post hoc test; values differ from 2 mM  
149 glutamine pyolysin challenge, \*\*\*  $P < 0.001$ , \*  $P < 0.05$ . (C) Stromal cells were  
150 cultured with 2 mM glutamine (Q, open symbols) or without glutamine (0 mM Q, filled  
151 symbols) for 24 h, and challenged for the indicated times with control medium or  
152 pyolysin; LDH leakage was measured in supernatants and normalized to cellular  
153 DNA in the control challenge. Data are mean (SEM) of 4 animals; analyzed by  
154 ANOVA with Dunnett's post hoc test; values differ from 2 mM glutamine pyolysin  
155 challenge, \*  $P < 0.05$ . (D) Stromal cells were cultured with glutamine (2 mM Q) or  
156 without glutamine (0 mM Q) for 24 h, and challenged for 2 h with control medium or  
157 pyolysin. Transmitted light micrographs of cells were captured at the end of the  
158 experiment; right column represents magnification of boxed areas from middle  
159 column; scale bar 10  $\mu\text{m}$ ; images are representative of cells from 4 animals. (E)  
160 Cells were also stained with phalloidin to visualize F-actin (white) and fluorescent  
161 microscope images collected; nuclei are red; scale bars are 20  $\mu\text{m}$ ; images are  
162 representative of cells from 4 animals. (F) Cells were cultured for 24 h in medium  
163 containing 2 mM glutamine (2) or without glutamine (0), and challenged for 2 h with  
164 control medium (■) or 10 HU pyolysin (■), and LDH measured in supernatants and

165 normalized to cellular DNA in the control challenge. Data are mean (SEM) of 12  
166 animals, analyzed by ANOVA with Bonferroni post hoc test; values differ from 2 mM  
167 glutamine pyolysin challenge, \*\*\* P <0.001.

168

169 We examined the possibility that glutamine deprivation might increase LDH  
170 leakage because there was more intracellular LDH if glutamine-deprived cells used  
171 lactate as an alternative metabolic substrate to glutamine. However, LDH activity in  
172 cell lysates was similar after 24 h culture of cells with or without glutamine (Fig 3A;  
173 independent t-test, P = 0.65, n = 4 animals). We also considered the possibility that  
174 glutamine might bind to pyolysin or neutralize the activity of pyolysin. To test this  
175 possibility we exploited horse red blood cells, which are highly sensitive to hemolysis  
176 caused by cholesterol-dependent cytolysins [14]. However, incubating glutamine with  
177 pyolysin did not affect hemolysis, whereas incubating pyolysin with cholesterol, as a  
178 control, reduced hemolysis, as expected for a cholesterol-dependent cytolysin (Fig  
179 3B).

180

181 **Fig 3. Glutamine is cytoprotective but does not alter intracellular LDH or bind**  
182 **pyolysin.** (A) Whole cell lysates were collected after 24 h treatment with 2 mM (2) or  
183 no glutamine (0), and intracellular LDH abundance measured, and normalized to  
184 cellular DNA. (B) Cytolysis of red blood cells, as determined by hemolysis assay,  
185 when treated with a serial dilution of pyolysin, after prior incubation of the pyolysin for  
186 1 h with vehicle (●), 2 mM glutamine (■), or 1 μM cholesterol (◆) used as a positive  
187 control to bind to pyolysin. Data are presented as mean of 2 experiments, with 2  
188 replicates per treatment. (C) Cells were cultured in serum-free medium containing 2



189 mM (2) or without glutamine (0) for 24 h before challenge with control medium (■) or  
190 pyolysin (■) for 2 h. The media were then replenished with medium containing 2 mM  
191 glutamine (2) or without glutamine (0) for a further 24 h and cellular DNA measured.  
192 Data are mean (SEM) from 4 animals, and analyzed by ANOVA and Bonferroni post  
193 hoc test; values differ from 2-2 within challenge group, \*  $P < 0.05$ , \*\*\*  $P < 0.001$   
194

195 As supplying glutamine prior to pyolysin challenge supported cytoprotection,  
196 we wondered whether glutamine could also help cells recover after pyolysin  
197 challenge. Cells were cultured for 24 h in the presence or absence of 2 mM  
198 glutamine and then challenged for 2 h with pyolysin, after which the media were  
199 replenished with or without 2 mM glutamine for a further 24 h. Cellular DNA was  
200 measured at the end of the experiment to estimate cell survival. Cells treated with  
201 glutamine prior to pyolysin challenge showed no significant difference ( $P = 0.18$ ) in  
202 cellular DNA remaining when media were replenished with glutamine or not after  
203 pyolysin challenge (Fig 3C, 2-2 and 2-0), with cell survival reduced by 26% and 33%,  
204 respectively. However, deprivation of glutamine prior to pyolysin challenge,  
205 irrespective of whether media were replenished with glutamine or not after pyolysin  
206 challenge, reduced cell survival by 70% and 88% (Fig 3C, 0-2 and 0-0,  $P < 0.001$ ).  
207 These data provide evidence that glutamine supported cytoprotection against  
208 pyolysin, but glutamine did not help recovery after pyolysin challenge.

209

## 210 **Glutamine supports stromal cell protection against streptolysin O**

211 We next examined whether glutamine affected stromal cytoprotection against  
212 another cholesterol-dependent cytolysin, streptolysin O (SLO). We first determined

213 that a 2 h challenge with SLO caused cell damage to bovine endometrial stromal  
214 cells, as determined by reduced cell viability and leakage of LDH (Fig 4A, B).  
215 However, limiting the availability of glutamine increased the leakage of LDH into cell  
216 supernatants when cells were challenged with SLO (Fig 4C; two-way ANOVA; n = 4  
217 animals,  $P < 0.001$ ). Together the data from Figs 2 to 4 provide evidence that  
218 glutamine supports stromal cell protection against cholesterol-dependent cytolysins.

219

220 **Fig 4. Glutamine is cytoprotection against streptolysin O.** Bovine endometrial  
221 stromal cells were challenged for 2 h with control serum-free medium (black bar) or  
222 medium containing the indicated concentrations of SLO (blue bars); cell viability was  
223 determined by MTT assay (A) and LDH leakage measured in the cell supernatants  
224 (B). Data are presented as mean (SEM) using cells from 4 animals; data were  
225 analyzed by ANOVA and P values reported. (C) Cells were cultured in medium  
226 containing the indicated concentrations of glutamine for 24 h, and challenged for 2 h  
227 with control medium (●) or 10 HU SLO (●), and LDH measured in supernatants and  
228 normalized to cellular DNA in the control challenge. Data are mean (SEM) of 4  
229 animals, analyzed by ANOVA with Dunnett's post hoc test; values differ from 2 mM  
230 glutamine SLO challenge, \*  $P < 0.05$ , \*\*  $P < 0.01$ , \*\*\*  $P < 0.001$

231

#### 232 **Glutamine supports HeLa cell protection against pyolysin and streptolysin O**

233 To examine whether the effect of glutamine on cytoprotection against  
234 cholesterol-dependent cytolysins was restricted to bovine endometrial stromal cells,  
235 we used immortalized human cervical epithelial cells, HeLa cells, because they are

236 widely employed to examine tissue cell responses to cholesterol-dependent  
237 cytolysins [6, 29, 30]. First, we established that challenging HeLa cells with pyolysin  
238 caused pore-formation, as determined by a reduction in intracellular potassium after  
239 5 min (Fig 5A), a reduction in cell viability after 2 h (Fig 5B), and an increase in the  
240 leakage of LDH from the cytosol into cell supernatants (Fig 5C).

241

242 **Fig 5. Cytolytic activity of pyolysin in HeLa cells and glutamine.** (A) HeLa cells  
243 were challenged for 5 min with control serum-free medium (●) or medium containing  
244 pyolysin (●), and potassium was measured in cell lysates. Data are presented using  
245 cells from 3 independent cell passages and the horizontal line represents the mean;  
246 data were analyzed by t-test. (B, C) Cells were challenged for 2 h with control serum-  
247 free medium (black bar) or medium containing the indicated concentrations of  
248 pyolysin (red bars); cell viability was determined by MTT assay and LDH leakage  
249 measured in the cell supernatants. Data are presented as mean (SEM) using cells  
250 from 4 passages; data were analyzed by ANOVA and P values reported. (D) Cells  
251 were cultured for 24 h in medium containing 2 mM glutamine (2) or without glutamine  
252 (0), and challenged for 5 min with control medium (●) or pyolysin (●). Intracellular  
253 potassium was determined by flame photometry. Data are from 3 passages, with the  
254 horizontal line indicating the mean. (E, F) Cells were cultured in medium containing  
255 the indicated concentrations of glutamine for 24 h, and challenged for 2 h with  
256 control medium (●), 10 HU pyolysin (●) or 10 HU SLO (●), and LDH measured in  
257 supernatants and normalized to cellular DNA in the control challenge. Data are mean  
258 (SEM) of 4 passages, analyzed by ANOVA with Dunnett's post hoc test; values differ  
259 from 2 mM glutamine cytolysin challenge, \*\*\* P <0.001. (G) Cells were cultured for

260 24 h in the presence of 2 mM glutamine (2 mM Q) or without glutamine (0 mM Q) in  
261 serum-free media, and then challenged for 2 h with control medium or pyolysin. The  
262 cells were stained with phalloidin to visualize F-actin (white) and fluorescent  
263 microscope images collected; nuclei are red; scale bars are 20  $\mu$ m. Images are  
264 representative of 3 experiments. (H) Cells were treated with medium containing 10%  
265 FBS with glutamine (2 mM Q,  $\bullet$ ) or without glutamine (0 mM Q,  $\blacksquare$ ) for 24 h before  
266 challenge with the indicated concentrations of pyolysin. Cell viability was determined  
267 by MTT assay and expressed as the percent of control. Data are mean (SEM) of 4  
268 passages.

269

270 To examine if the availability of glutamine affected cytoprotection against  
271 pyolysin, HeLa cells were cultured for 24 h in serum-free media containing excess  
272 glucose (25 mM) with a range of concentrations of glutamine (0 to 2 mM), and then  
273 challenged for 2 h with control medium or 10 HU/well pyolysin. Irrespective of  
274 glutamine availability, pyolysin caused pore formation, as determined by loss of  
275 intracellular potassium within 5 min (Fig 5D; two-way ANOVA,  $P < 0.001$ ). However,  
276 limiting the availability of glutamine increased the accumulation of LDH in  
277 supernatants when HeLa cells were challenge with pyolysin (Fig 5E; two-way  
278 ANOVA,  $P = 0.002$ ). HeLa cells are also sensitive to SLO [30, 31], and we found that  
279 glutamine deprivation also increased LDH leakage when HeLa cells were challenges  
280 with SLO (Fig 5F; two-way ANOVA,  $P < 0.0001$ ).

281 Staining actin with phalloidin also showed that HeLa cells cultured in  
282 glutamine lost their characteristic angular shape and became rounded when  
283 challenged with pyolysin, although they usually maintained defined cell boundaries

284 (Fig 5G). However, cells deprived of glutamine and challenged with pyolysin were  
285 more misshapen with less clear boundaries (Fig 5G).

286 We also took advantage of similar growth curves for HeLa cells irrespective of  
287 the glutamine supply when cells were cultured with 10% fetal bovine serum, as  
288 determined by MTT assay (Supplementary Fig 1). Cells cultured with serum but  
289 without glutamine prior to pyolysin challenge were more sensitive to cytolysis than  
290 cells cultured in 2 mM glutamine (Fig 5H; two-way ANOVA,  $P = 0.001$ ). Together, the  
291 data in Fig 5 provide evidence that glutamine supports HeLa cell protection against  
292 cholesterol-dependent cytolysins.

293

#### 294 **Glutaminolysis was not essential for cytoprotection against pyolysin**

295 One obvious mechanism for the cytoprotective effect of glutamine against  
296 cholesterol-dependent cytolysins is that glutamine could supply cellular energy -  
297 even though the cells were supplied with excess glucose (11 mM for stroma, 25 mM  
298 for HeLa cells). First we showed that glucose was used by the cells for energy  
299 because inhibiting glycolysis with 2-deoxy-D-glucose (2DG) markedly increased LDH  
300 leakage from stromal cells challenged with pyolysin, even when cells were supplied  
301 with 2 mM glutamine (Fig 6A). To explore the importance of glutamine as an energy  
302 substrate for cytoprotection, we examined the role of glutaminolysis, whereby  
303 glutaminase converts glutamine to glutamate, which is metabolized to succinate to  
304 replenish the Krebs cycle [9, 24]. To inhibit glutaminolysis we used the inhibitor  
305 BPTES, a bis-thiadiazole that induces an inactive conformation of glutaminase, and  
306 DON, a non-standard amino acid 6-Diazo-5-oxo-L-norleucine that covalently binds  
307 glutaminase. We postulated that inhibiting glutaminase in cells supplied with 2 mM

308 glutamine would mimic glutamine deprivation, leading to increased leakage of LDH.  
309 As before, in the absence of the glutaminase inhibitors, glutamine deprivation  
310 increased the leakage of LDH from cells challenged with pyolysin (Fig 6B, C).  
311 However, the leakage of LDH after pyolysin challenge was not significantly increased  
312 in cells treated with BPTES (Fig 6B; two-way ANOVA,  $P = 0.86$ ) or DON (Fig 6C;  
313 two-way ANOVA,  $P = 0.52$ ). In a complementary approach, we cultured cells with a  
314 range of concentrations of succinate, in glutamine-free medium, to assess whether  
315 the beneficial effect of glutamine was by replenishing the Krebs cycle, and to  
316 account for the GABA (gamma-aminobutyric acid) shunt converting glutamine to  
317 succinate [9]. However, supplying succinate did not significantly reduce the leakage  
318 of LDH from cells in glutamine-free medium (Fig 6D; two-way ANOVA,  $P = 0.99$ ).

319

320 **Fig 6. Stromal cell metabolism and protection against pyolysin.** Bovine  
321 endometrial stromal cells were cultured in serum-free media for 24 h with the  
322 indicated concentrations of glutamine and glycolysis inhibitor 2-deoxy-D-glucose (A),  
323 glutaminolysis inhibitors BPTES (B) and DON (C), succinate (D), AMPK activator  
324 AICAR (E), or mTOR inhibitor rapamycin (F), and then challenged for 2 h with control  
325 medium (■) or pyolysin (■). The leakage of LDH from cells was measured in cell  
326 supernatants, and normalized to cellular DNA in the control challenge. Data are  
327 presented as mean (SEM) using 4 animals for each experiment. Data were analyzed  
328 by ANOVA and Dunnett's post hoc test; reported P values are the effect of the  
329 treatment on the response to pyolysin challenge. ND, not detectable.

330

331 Cells regulate their energy homeostasis using AMP-activated protein kinase  
332 (AMPK), which senses increased AMP:ATP ratios, and mammalian target of  
333 rapamycin (mTOR), which integrates satiety signals from hormones, growth factors,  
334 and the abundance of amino acids, including glutamine [32, 33]. As glutamine  
335 influences AMPK and mTOR signaling [32, 34], we considered whether AMPK and  
336 mTOR might affect the ability of glutamine to support cytoprotection against pyolysin.  
337 However, there was no substantive effect on LDH leakage from cells challenged with  
338 pyolysin when mimicking metabolic energy deficits by activating AMPK with AICAR  
339 (Fig 6E; ANOVA,  $P = 0.42$ ) or inhibiting mTOR with rapamycin (Fig 6F: ANOVA,  $P =$   
340  $0.07$ ). Together, the data in Fig 6 provide evidence that cytoprotection against  
341 pyolysin was not dependent on glutamine replenishing the Krebs cycle.

342

### 343 **Glutamine and cellular cholesterol**

344 A second mechanism for the cytoprotective effect of glutamine against  
345 cholesterol-dependent cytolyticins is that glutamine could reduce cellular cholesterol.  
346 Methyl- $\beta$ -cyclodextrin reduces cellular cholesterol [14, 29], and in the present study,  
347 treating cells with 0.5 mM methyl- $\beta$ -cyclodextrin for 24 h reduced cellular cholesterol  
348 in HeLa cells (Fig 7A) and in stromal cells (Fig 7B). This reduced cellular cholesterol  
349 also protected the cells against a 2 h pyolysin challenge, as determined by MTT  
350 assay for HeLa cells (methyl- $\beta$ -cyclodextrin vs. vehicle,  $96.6 \pm 7.3$  vs  $14.8 \pm 0.5\%$   
351 viability of control;  $P < 0.001$ , t-test,  $n = 4$ ) and stromal cells (methyl- $\beta$ -cyclodextrin vs  
352 vehicle,  $76.7 \pm 13.4$  vs  $11.8 \pm 3.2\%$  viability of control;  $P < 0.001$ , t-test,  $n = 7$ ).  
353 However, HeLa cell or endometrial stromal cell cholesterol concentrations did not  
354 significantly differ when cultured with or without 2 mM glutamine (Fig 7A, B). We also

355 took advantage of the well-defined HeLa cell shape and used filipin and confocal  
356 microscopy to examine the distribution of cholesterol [35]. HeLa cells cultured with or  
357 without glutamine showed little difference in staining intensity (Fig 7C). Taken  
358 together these data do not support the idea that glutamine could alter cytoprotection  
359 against cholesterol-dependent cytolysins by modifying cellular cholesterol.

360

361 **Fig 7. Glutamine and cellular cholesterol.** HeLa cells (A) and bovine endometrial  
362 stromal cells (B) were cultured for 24 h in serum-free media with glutamine (2 mM  
363 Q), 0.5 mM methyl- $\beta$ -cyclodextrin (M $\beta$ CD), or without glutamine (0 mM Q). Cellular  
364 cholesterol was measured and normalized to the phospholipid content to account for  
365 differences in cell growth. Data are presented using 4 independent cell passages for  
366 HeLa cells or 4 animals for stromal cells; the horizontal line represents the mean.  
367 Data were analyzed by ANOVA and Dunnett's post hoc test; values differ from 2 mM  
368 glutamine, \*  $P < 0.05$ , \*\*\*  $P < 0.001$ . (C) Confocal microscope images of HeLa cells  
369 stained with filipin to visualize cholesterol (white) for the indicated treatments; scale  
370 bars are 20  $\mu$ m.

371

## 372 Discussion

373 We found that glutamine supports the protection of tissue cells against the  
374 damage caused by cholesterol-dependent cytolysins from pathogenic bacteria. The  
375 role of glutamine in cytoprotection was unexpected, but was consistent across a  
376 range of experiments. Glutamine supported cytoprotection against two different  
377 cholesterol-dependent cytolysins, pyolysin and streptolysin O, in two disparate tissue



378 cell types, primary bovine endometrial stromal cells and immortalized human cervical  
379 epithelial cells.

380 Even though pores formed in the cell membrane, as evidenced by the rapid  
381 leakage of potassium from cells, supplying glutamine reduced the damage that the  
382 cytolysins caused to the cells. This glutamine cytoprotection was evident by  
383 examining cell viability, imaging cells, and by measuring the leakage of LDH from  
384 cells. We chose a 2 h challenge with cholesterol-dependent cytolysins because this  
385 would more likely test cytoprotection than a longer cytolysin challenge, which might  
386 also reflect longer-term immune and recovery responses [6, 28]. Finding that  
387 glutamine reduced pyolysin-induced cell death if given before, but not after pyolysin  
388 challenge also supports a role for glutamine in protecting cells, rather than damage  
389 repair. The beneficial role of glutamine in tissue cytoprotection complements the role  
390 glutamine plays in immune cell metabolism and supporting inflammatory responses  
391 to pathogens [9, 36].

392 Infections are metabolically demanding [9, 25, 37]. We therefore considered  
393 whether cytoprotection against cholesterol-dependent cytolysins might depend on  
394 glutamine replenishing the Krebs cycle [9]. Although glutaminase is active in  
395 fibroblasts and HeLa cells [38, 39], glutaminase inhibitors did not impair  
396 cytoprotection against pyolysin in the present study, and supplying succinate to cells  
397 in glutamine-free media did not enhance cytoprotection. Damage and infections also  
398 activate AMPK, and glutamine regulates AMPK and mTORC1 signaling [32, 34], but  
399 manipulating AMPK or mTOR in the present study did not affect cytoprotection  
400 against pyolysin. Taken together, these lines of evidence imply that whilst glutamine  
401 was important for cytoprotection against cholesterol-dependent cytolysins, the  
402 mechanism did not depend on glutaminolysis. These findings are intriguing because

403 although immunity and tolerance complement each other, they can employ different  
404 mechanisms [36, 40, 41]. Indeed, whilst succinate did not contribute to  
405 cytoprotection against cytolytins here, cellular succinate regulates innate immunity  
406 and drives inflammatory responses to bacterial lipopolysaccharide in macrophages  
407 [9, 10]. Furthermore, manipulating AMPK or mTOR, as well as reducing the  
408 availability of glucose or glutamine, impairs inflammatory responses to  
409 lipopolysaccharide in the bovine endometrium [42, 43].

410 Cholesterol is the binding target for pyolysin and SLO [5], and reducing  
411 cholesterol in the cell membrane increases cytoprotection against cholesterol-  
412 dependent cytolytins [14, 30, 44]. However, in the present study, any effects of  
413 glutamine on cellular cholesterol abundance or distribution were modest compared  
414 with methyl- $\beta$ -cyclodextrin. These findings are plausible because glutamine can  
415 provide citrate for cholesterol synthesis, and glutamine stimulates the expression of  
416 genes associated with cholesterol synthesis [45, 46].

417 It was surprising that cells only appeared to need > 0.25 mM glutamine to  
418 provide cytoprotection against the cytolytins. Whilst, there is about 0.7 mM  
419 glutamine in human plasma and 0.25 mM in bovine plasma [8, 25], it is possible that  
420 cells lying within damaged tissues may have less access to glutamine. The need for  
421 only a small amount of glutamine may also explain why the glutaminase inhibitors  
422 did not increase cellular sensitivity to cytolytins. As glutamine contributes to amino  
423 acids, proteins, and nucleotides, as well as supplying the Krebs cycle, future studies  
424 might use radiolabeled glutamine to trace where glutamine may contribute to cell  
425 protection mechanisms, which include cell stress responses, membrane repair, and  
426 cytoskeletal maintenance [6, 7, 15, 28, 29, 31, 47].

427           In conclusion, we found that glutamine supports the protection of tissue cells  
428 against the damage caused by cholesterol-dependent cytolysins from pathogenic  
429 bacteria. More work will be needed to determine the mechanism linking glutamine to  
430 cytoprotection against cytolysins. However, the implication of finding that glutamine  
431 supports cytoprotection is that glutamine may help tissues to tolerate pathogenic  
432 bacteria that secrete cholesterol-dependent cytolysins.

433

#### 434 **Methods**

##### 435 **Ethical statement**

436           No live animal experiments were performed. Uteri were collected from cattle  
437 after slaughter and processing as part of the normal work of a commercial  
438 slaughterhouse, with approval (registration number U1268379/ABP/OTHER) from  
439 the United Kingdom (UK) Department for Environment, Food and Rural Affairs under  
440 the Animal By-products Registration (EC) No. 1069/2009.

##### 441 **Cell culture**

442           To isolate bovine endometrial stromal cells, uteri were collected after  
443 slaughter from post pubertal, non-pregnant animals with no evidence of genital  
444 disease or microbial infection. Endometrial stromal cells were isolated, cell purity  
445 confirmed, and the absence of immune cell contamination verified, as described  
446 previously [14, 48, 49]. Briefly, stromal cells were isolated by enzymatic digestion of  
447 the endometrium, sieving the cell suspension through 70- $\mu$ m mesh to remove debris,  
448 and then through a 40- $\mu$ m mesh (pluriStrainer®, Cambridge Bioscience, Cambridge,  
449 UK) to isolate stromal cells, followed by adhesion to culture plates within 18 h, at

450 which time any contaminating epithelial cells were washed away. The cells were  
451 maintained in 75 cm<sup>2</sup> flasks (Greiner Bio-One, Gloucester, UK) with complete  
452 medium, comprising RPMI-1640 medium (61870, Thermo Fisher Scientific, Paisley,  
453 UK), 10% FBS (Biosera, East Sussex, UK), 50 IU/ml of penicillin, 50 µg/ml of  
454 streptomycin and 2.5 µg/ml of amphotericin B (all Sigma).

455 The HeLa cells (Public Health England; 93021013, HeLa CCL2) were  
456 maintained in 75 cm<sup>2</sup> flasks with complete medium, comprising DMEM (41965,  
457 Thermo Fisher Scientific) 10% FBS, 50 IU/ml penicillin, 50 µg/ml streptomycin, and  
458 2.5 µg/ml amphotericin B. The HeLa cell identity was confirmed at the end of the  
459 study by short tandem repeat profiling (Report Reference SOJ39361; ATCC,  
460 Manassas, VA, USA). Cells were incubated at 37°C in humidified air with 5% CO<sub>2</sub>.

#### 461 **Cholesterol-dependent cytolysins**

462 The *plo* plasmid (pGS59) was a gift from Dr H Jost (University of Arizona),  
463 and pyolysin protein was generated as described previously [14, 50]. The activity of  
464 pyolysin was 628,338 HU/mg protein, as determined by hemolysis assay using horse  
465 red blood cells (Oxoid, Hampshire, UK), as described previously [14, 51]. Endotoxin  
466 contamination was 1.5 EU/mg protein, as determined by a limulus amoebocyte lysate  
467 assay (LAL endotoxin quantitation kit; Thermo Fisher Scientific, Hertfordshire, UK).  
468 Streptolysin O was stored as 1 mg/ml solution and activated using 10 mM  
469 dithiothreitol according to the manufacturer's instructions (Sigma, Gillingham, UK).  
470 To examine pyolysin binding, 100 HU/ml pyolysin was incubated for 1 h in PBS with  
471 vehicle, 2 mM glutamine, or 1 mM cholesterol, and a hemolysis assay conducted.

## 472 **Glutamine manipulation**

473 The bovine endometrial stromal cells were seeded at  $5 \times 10^4$  cells/well in 24-  
474 well plates and incubated for 24 h in complete medium. The cells were then  
475 incubated for 24 h in serum-free medium containing the amounts of L-glutamine  
476 specified in *Results*, which were generated by combining defined ratios of RPMI1640  
477 with or without L-glutamine (11875, 11.1 mM glucose, 2 mM glutamine; and, 31870,  
478 11.1 mM glucose, no glutamine; Thermo Fisher Scientific).

479 The HeLa cells were seeded at  $4 \times 10^4$  cells/well in complete medium for 24  
480 h, followed by a further 24 h in serum-free medium containing the amounts of L-  
481 glutamine specified in *Results*, which were generated by combining defined ratios of  
482 DMEM with or without L-glutamine (41965, 25 mM glucose, 4 mM glutamine; and,  
483 11960, 25 mM glucose, no glutamine; Thermo Fisher Scientific).

484 After the treatment period, cells were challenged with their corresponding  
485 control medium, or medium containing pyolysin or SLO, as specified in *Results*. In  
486 some experiments, transmitted light images of the cells were collected using an an  
487 Axiovert 40C inverted microscope and AxioCam ERc5s camera (Zeiss, Jena,  
488 Germany). At the end of experiments, cell supernatants were collected for LDH  
489 quantification, and cells used for measuring cellular DNA or viability.

## 490 **Nutrients and inhibitors**

491 To examine the effect of nutrients, cells were seeded and cultured for 24 h in  
492 complete media, and then cultured for 24 h in serum-free media containing the  
493 amounts reported in *Results* of dimethyl succinate (W239607, Sigma). After 24 h  
494 treatment, cells were challenged for 2 h with pyolysin, and supernatants and cells  
495 collected. To examine the effect of inhibitors, cells were seeded and cultured for 24 h

496 in complete media, and then cultured for 24 h in serum-free media containing the  
497 amounts reported in *Results* of the glycolysis inhibitor 2-deoxy-D-glucose (2DG;  
498 D3179, Sigma), the glutaminase inhibitors BPTES (314045, EMD Millipore,  
499 Hertfordshire, UK) or DON (D2141, Sigma), the AMPK activator AICAR (2840,  
500 Tocris, Bristol, UK), the mTOR inhibitor rapamycin (553211, EMD Millipore), or  
501 methyl- $\beta$ -cyclodextrin (332615, Sigma). After 24 h treatment, cells were challenged  
502 for 2 h with control medium or pyolysin, and supernatants and cells collected.

### 503 **Cell viability**

504 The mitochondria-dependent reduction of 3-(4,5-dimethylthiazol-2-yl)-2,5-  
505 diphenyltetrazolium bromide (MTT, Sigma) to formazan was used to assess cell  
506 viability, as described previously [14]. As nutrient availability may influence the  
507 reduction of MTT, cell abundance was also determined by measuring cellular DNA  
508 content. Briefly, at the end of experiments when supernatants were removed, the  
509 cells were washed in 500  $\mu$ l ice-cold PBS before being stored at  $-80^{\circ}\text{C}$  overnight to  
510 ensure lysis, and DNA was measured using the CyQUANT Cell Proliferation Assay  
511 Kit (Thermo Fisher Scientific).

### 512 **Lactate dehydrogenase and potassium leakage**

513 Lactate dehydrogenase leakage from cells was measured in cell supernatants  
514 using a Lactate Dehydrogenase Activity Assay Kit (Cambridge Bioscience) [6, 51].  
515 Where indicated in *Results*, LDH leakage from cells was normalized to the cellular  
516 DNA in the control challenge.

517 To examine potassium leakage,  $7.5 \times 10^5$  cells were seeded in 75  $\text{cm}^2$  culture  
518 flasks in complete media for 24 h, before treatment with or without 2 mM glutamine

519 for a further 24 h in serum-free media. Media were then discarded and cells washed  
520 3 x with potassium-free choline buffer (129 mM choline-Cl, 0.8 mM MgCl<sub>2</sub>, 1.5 mM  
521 CaCl<sub>2</sub>, 5 mM citric acid, 5.6 mM glucose, 10 mM NH<sub>4</sub>Cl, 5 mM H<sub>3</sub>PO<sub>4</sub>, pH 7.4; all  
522 Sigma). Cells were then incubated in choline-buffer with control medium or pyolysin  
523 for 5 min at 37°C. Subsequently, cells were washed 3 x in ice-cold choline-buffer and  
524 lysed in 0.5% Triton X-100 (Sigma) in double-distilled water for 20 min at room  
525 temperature with gentle agitation. Potassium was measured in the cleared lysates  
526 using a Jenway PFP7 flame photometer (Cole-Parmer, Stone, Staffordshire, UK).

### 527 **Cholesterol assay**

528 The bovine endometrial stromal cells and HeLa cells were grown at a density  
529 of 10<sup>5</sup> cells/well in 12-well tissue culture plates for 24 h in complete media, and then  
530 cultured for 24 h in serum-free media with or without 2 mM glutamine, or 0.5 mM  
531 methyl-β-cyclodextrin, as described in *Results*. After the treatment period, cells were  
532 collected in 200 μl/well cholesterol assay buffer (Thermo Fisher Scientific) and stored  
533 in Eppendorf tubes at -20°C. When needed, samples were defrosted at room  
534 temperature and sonicated for 10 min in a sonicating water bath. Cellular cholesterol  
535 content was measured using the Amplex® Red Cholesterol Assay Kit (Thermo  
536 Fisher Scientific). Total cellular phospholipid was measured in the samples prepared  
537 for the cholesterol assay using a phospholipid assay kit (MAK122, Sigma).  
538 Cholesterol concentrations were then normalized to phospholipid concentrations.

### 539 **Immunofluorescence**

540 To examine actin distribution, cells were seeded at a 5 x 10<sup>4</sup> cells on glass  
541 coverslips in a 24-well plate in complete medium for 24 h, followed by a further 24 h  
542 in serum-free medium with or without 2 mM glutamine. Cells were challenged for 2 h

543 with the corresponding control medium or medium containing pyolysin, as specified  
544 in *Results*. Cells were washed with PBS, fixed with 4% paraformaldehyde, washed in  
545 PBS and then permeabilized in 0.2% Triton X-100. Cells were then blocked using  
546 0.5% bovine serum albumin and 0.1% Triton X-100 in PBS, followed by incubation  
547 with Alexa Fluor™ 555 Phalloidin (Thermo Fisher Scientific). Cells were washed in  
548 0.1% Triton X-100 in PBS three times and mounted onto microscope slides, using  
549 4',6-diamidino-2-phenylindole (Vectashield with DAPI; Vector Laboratories Inc.,  
550 Burlington, CA, USA) to visualize cell nuclei. Cell morphology and target localization  
551 were analyzed with an Axio Imager M1 upright fluorescence microscope (Zeiss,  
552 Jena, Germany) and images captured using an AxioCamMR3.

553 To image cholesterol,  $5 \times 10^4$  cells were seeded on glass coverslips in a 24  
554 well plate in complete medium for 24 h, followed by 24 h in serum-free medium with  
555 or without L-glutamine, or 0.5 mM methyl- $\beta$ -cyclodextrin, as described in *Results*.  
556 Coverslips were washed with PBS, fixed with 4% paraformaldehyde, and washed  
557 with PBS. Coverslips were then incubated for 45 mins at room temperature with 50  
558  $\mu$ g/ml filipin III from *Streptomyces filipinensis* (Sigma). Cells were washed with PBS  
559 before being mounted using 2.5% Mowiol mounting medium containing 2.5%  
560 DABCO (1,4-diazabicyclo-(2,2,2)-octane, Merck). Cell cholesterol was analyzed  
561 using a LSM710 confocal microscope (Zeiss) with the Zeiss Zen 2010 software.  
562 Images were captured using a x 63 oil objective using the channel range 410-476  
563 nm, and coverslips were subjected to identical exposure times and conditions.

## 564 **Statistical analysis**

565 Data are presented as arithmetic mean and error bars represent SEM. The  
566 statistical unit was each animal used to isolate bovine endometrial stromal cells or



567 each independent passage of HeLa cells. Statistical analysis was performed using  
568 SPSS 22.0 (SPSS Inc. Chicago, IL), and  $P < 0.05$  was considered significant.  
569 Comparisons were made between treatments using one-way or two-way ANOVA  
570 with two-tailed Bonferroni or Dunnett posthoc test, or unpaired two-tailed Student's t  
571 test, as specified in *Results* and figure legends.

572

### 573 **Acknowledgements**

574 We thank J Cronin and E Dudley for advice, T Ormsby for technical  
575 assistance, and H Jost for supplying pyolysin.

576

### 577 **References**

- 578 1. Raberg L, Sim D, Read AF. Disentangling genetic variation for resistance and  
579 tolerance to infectious diseases in animals. *Science*. 2007;318(5851):812-4. Epub  
580 2007/11/03. doi: 10.1126/science.1148526. PubMed PMID: 17975068.
- 581 2. Schneider DS, Ayres JS. Two ways to survive infection: what resistance and  
582 tolerance can teach us about treating infectious diseases. *Nat Rev Immunol*.  
583 2008;8(11):889-95. Epub 2008/10/18. doi: 10.1038/nri2432. PubMed PMID:  
584 18927577; PubMed Central PMCID: PMC4368196.
- 585 3. Medzhitov R, Schneider DS, Soares MP. Disease tolerance as a defense  
586 strategy. *Science*. 2012;335(6071):936-41. doi: 10.1126/science.1214935. PubMed  
587 PMID: 22363001; PubMed Central PMCID: PMC PMC3564547.

- 588 4. Peraro MD, van der Goot FG. Pore-forming toxins: ancient, but never really  
589 out of fashion. *Nat Rev Micro*. 2016;14(2):77-92. doi: 10.1038/nrmicro.2015.3.  
590 PubMed PMID: 26639780.
- 591 5. Bischofberger M, Iacovache I, van der Goot FG. Pathogenic pore-forming  
592 proteins: function and host response. *Cell Host Microbe*. 2012;12(3):266-75. Epub  
593 2012/09/18. doi: 10.1016/j.chom.2012.08.005. PubMed PMID: 22980324.
- 594 6. Gonzalez MR, Bischofberger M, Freche B, Ho S, Parton RG, van der Goot  
595 FG. Pore-forming toxins induce multiple cellular responses promoting survival. *Cell*  
596 *Microbiol*. 2011;13:1026-43. doi: 10.1111/j.1462-5822.2011.01600.x. PubMed PMID:  
597 21518219.
- 598 7. Los FC, Randis TM, Aroian RV, Ratner AJ. Role of pore-forming toxins in  
599 bacterial infectious diseases. *Microbiol Mol Biol Rev*. 2013;77(2):173-207. Epub  
600 2013/05/24. doi: 10.1128/MMBR.00052-12. PubMed PMID: 23699254; PubMed  
601 Central PMCID: PMC3668673.
- 602 8. Curi R, Lagranha CJ, Doi SQ, Sellitti DF, Procopio J, Pithon-Curi TC, et al.  
603 Molecular mechanisms of glutamine action. *J Cell Physiol*. 2005;204(2):392-401.  
604 Epub 2005/03/30. doi: 10.1002/jcp.20339. PubMed PMID: 15795900.
- 605 9. Tannahill GM, Curtis AM, Adamik J, Palsson-McDermott EM, McGettrick AF,  
606 Goel G, et al. Succinate is an inflammatory signal that induces IL-1beta through HIF-  
607 1alpha. *Nature*. 2013;496(7444):238-42. Epub 2013/03/29. doi:  
608 10.1038/nature11986. PubMed PMID: 23535595.
- 609 10. Mills EL, Kelly B, Logan A, Costa ASH, Varma M, Bryant CE, et al. Succinate  
610 Dehydrogenase Supports Metabolic Repurposing of Mitochondria to Drive  
611 Inflammatory Macrophages. *Cell*. 2016;167(2):457-70. doi:

- 612 10.1016/j.cell.2016.08.064. PubMed PMID: 27667687; PubMed Central PMCID:  
613 PMCPMC5863951.
- 614 11. Alouf JE. Streptococcal toxins (streptolysin O, streptolysin S, erythrogenic  
615 toxin). Pharmacol Ther. 1980;11(3):661-717. Epub 1980/01/01. doi: 10.1016/0163-  
616 7258(80)90045-5. PubMed PMID: 7003609.
- 617 12. Bhakdi S, Trantumjensen J, Sziegoleit A. Mechanism of membrane damage  
618 by streptolysin-O. Infect Immun. 1985;47(1):52-60. PubMed PMID: 3880730;  
619 PubMed Central PMCID: PMCPMC261464.
- 620 13. Jost BH, Billington SJ. Arcanobacterium pyogenes: molecular pathogenesis of  
621 an animal opportunist. Antonie van Leeuwenhoek. 2005;88(2):87-102. doi:  
622 10.1007/s10482-005-2316-5. PubMed PMID: 16096685.
- 623 14. Amos MR, Healey GD, Goldstone RJ, Mahan S, Duvel A, Schuberth HJ, et al.  
624 Differential endometrial cell sensitivity to a cholesterol-dependent cytolysin links  
625 *Trueperella pyogenes* to uterine disease in cattle Biol Reprod. 2014;90:54,1-13. doi:  
626 10.1095/biolreprod.113.115972. PubMed PMID: 24478394.
- 627 15. Griffin S, Healey GD, Sheldon IM. Isoprenoids increase bovine endometrial  
628 stromal cell tolerance to the cholesterol-dependent cytolysin from *Trueperella*  
629 *pyogenes*. Biol Reprod. 2018;99(4):749-60. Epub 2018/04/25. doi:  
630 10.1093/biolre/i0y099. PubMed PMID: 29688258; PubMed Central PMCID:  
631 PMCPMC6203874.
- 632 16. Sheldon IM, Lewis GS, LeBlanc S, Gilbert RO. Defining postpartum uterine  
633 disease in cattle. Theriogenology. 2006;65(8):1516-30. doi:  
634 10.1016/j.theriogenology.2005.08.021. PubMed PMID: 16226305.
- 635 17. Hammon DS, Evjen IM, Dhiman TR, Goff JP, Walters JL. Neutrophil function  
636 and energy status in Holstein cows with uterine health disorders. Vet Immunol

- 637 Immunopathol. 2006;113(1-2):21-9. doi: 10.1016/j.vetimm.2006.03.022. PubMed  
638 PMID: 16740320.
- 639 18. LeBlanc SJ. Interactions of metabolism, inflammation, and reproductive tract  
640 health in the postpartum period in dairy cattle. *Reprod Domest Anim.* 2012;47 Suppl  
641 5:18-30. Epub 2012/08/29. doi: 10.1111/j.1439-0531.2012.02109.x. PubMed PMID:  
642 22913557.
- 643 19. Yasui T, McCann K, Gilbert RO, Nydam DV, Overton TR. Associations of  
644 cytological endometritis with energy metabolism and inflammation during the  
645 periparturient period and early lactation in dairy cows. *J Dairy Sci.* 2014;97(5):2763-  
646 70. doi: 10.3168/jds.2013-7322. PubMed PMID: 24612816.
- 647 20. Sheldon IM, Cronin JC, Bromfield JJ. Tolerance and innate immunity shape  
648 the development of postpartum uterine disease and the impact of endometritis in  
649 dairy dattle. *Annual Review of Animal Biosciences.* 2019;7(1):361-84. doi:  
650 10.1146/annurev-animal-020518-115227. PubMed PMID: 30359085; PubMed  
651 Central PMCID: PMCPMC6450715.
- 652 21. DeBerardinis RJ, Mancuso A, Daikhin E, Nissim I, Yudkoff M, Wehrli S, et al.  
653 Beyond aerobic glycolysis: Transformed cells can engage in glutamine metabolism  
654 that exceeds the requirement for protein and nucleotide synthesis. *Proc Natl Acad  
655 Sci U S A.* 2007;104(49):19345-50. doi: 10.1073/pnas.0709747104. PubMed PMID:  
656 18032601; PubMed Central PMCID: PMCPMC2148292.
- 657 22. Lemons JM, Feng XJ, Bennett BD, Legesse-Miller A, Johnson EL, Raitman I,  
658 et al. Quiescent fibroblasts exhibit high metabolic activity. *PLoS Biol.*  
659 2010;8(10):e1000514. Epub 2010/11/05. doi: 10.1371/journal.pbio.1000514.  
660 PubMed PMID: 21049082; PubMed Central PMCID: PMC2958657.

- 661 23. Reitzer LJ, Wice BM, Kennell D. Evidence that glutamine, not sugar, is the  
662 major energy source for cultured HeLa cells. *J Biol Chem.* 1979;254(8):2669-76.  
663 Epub 1979/04/25. PubMed PMID: 429309.
- 664 24. Finley LW, Zhang J, Ye J, Ward PS, Thompson CB. SnapShot: cancer  
665 metabolism pathways. *Cell Metab.* 2013;17(3):466- e2. Epub 2013/03/12. doi:  
666 10.1016/j.cmet.2013.02.016. PubMed PMID: 23473039.
- 667 25. Meijer GA, van der Meulen J, van Vuuren AM. Glutamine is a potentially  
668 limiting amino acid for milk production in dairy cows: a hypothesis. *Metabolism.*  
669 1993;42(3):358-64. Epub 1993/03/01. doi: 10.1016/0026-0495(93)90087-5. PubMed  
670 PMID: 8487655.
- 671 26. Newsholme P. Why Is L-Glutamine Metabolism Important to Cells of the  
672 Immune System in Health, Postinjury, Surgery or Infection? *The Journal of Nutrition.*  
673 2001;131(9):2515S-22S. doi: 10.1093/jn/131.9.2515S. PubMed PMID: 11533304.
- 674 27. Wischmeyer PE, Kahana M, Wolfson R, Ren H, Musch MM, Chang EB.  
675 Glutamine reduces cytokine release, organ damage, and mortality in a rat model of  
676 endotoxemia. *Shock.* 2001;16(5):398-402. Epub 2001/11/09. PubMed PMID:  
677 11699081.
- 678 28. Witzenrath M, Pache F, Lorenz D, Koppe U, Gutbier B, Tabeling C, et al. The  
679 NLRP3 Inflammasome Is Differentially Activated by Pneumolysin Variants and  
680 Contributes to Host Defense in Pneumococcal Pneumonia. *J Immunol.*  
681 2011;187(1):434-40. doi: 10.4049/jimmunol.1003143. PubMed PMID: 21646297.
- 682 29. Gurcel L, Abrami L, Girardin S, Tschopp J, van der Goot FG. Caspase-1  
683 activation of lipid metabolic pathways in response to bacterial pore-forming toxins  
684 promotes cell survival. *Cell.* 2006;126(6):1135-45. doi: 10.1016/j.cell.2006.07.033.  
685 PubMed PMID: 16990137.

- 686 30. Preta G, Lotti V, Cronin JG, Sheldon IM. Protective role of the dynamin  
687 inhibitor Dynasore against the cholesterol-dependent cytolysin of *Trueperella*  
688 *pyogenes*. FASEB J. 2015;29(4):1516-28. Epub 2015/01/01. doi: 10.1096/fj.14-  
689 265207. PubMed PMID: 25550455.
- 690 31. Idone V, Tam C, Goss JW, Toomre D, Pypaert M, Andrews NW. Repair of  
691 injured plasma membrane by rapid Ca<sup>2+</sup>-dependent endocytosis. J Cell Biol.  
692 2008;180(5):905-14. Epub 2008/03/05. doi: 10.1083/jcb.200708010. PubMed PMID:  
693 18316410; PubMed Central PMCID: PMC2265401.
- 694 32. Hardie DG, Ross FA, Hawley SA. AMPK: a nutrient and energy sensor that  
695 maintains energy homeostasis. Nat Rev Mol Cell Biol. 2012;13(4):251-62. Epub  
696 2012/03/23. doi: 10.1038/nrm3311. PubMed PMID: 22436748.
- 697 33. Zoncu R, Efeyan A, Sabatini DM. mTOR: from growth signal integration to  
698 cancer, diabetes and ageing. Nat Rev Mol Cell Biol. 2011;12(1):21-35. Epub  
699 2010/12/16. doi: 10.1038/nrm3025. PubMed PMID: 21157483; PubMed Central  
700 PMCID: PMC3390257.
- 701 34. Jewell JL, Kim YC, Russell RC, Yu F-X, Park HW, Plouffe SW, et al.  
702 Differential regulation of mTORC1 by leucine and glutamine. Science. 2015;347:194-  
703 8. doi: 10.1126/science.1259472. PubMed PMID: 25567907; PubMed Central  
704 PMCID: PMCPMC4384888.
- 705 35. Schwan C, Nolke T, Kruppke AS, Schubert DM, Lang AE, Aktories K.  
706 Cholesterol- and sphingolipid-rich microdomains are essential for microtubule-based  
707 membrane protrusions induced by *Clostridium difficile* transferase (CDT). J Biol  
708 Chem. 2011;286(33):29356-65. Epub 2011/06/28. doi: 10.1074/jbc.M111.261925.  
709 PubMed PMID: 21705797; PubMed Central PMCID: PMC3190741.

- 710 36. Wang A, Luan HH, Medzhitov R. An evolutionary perspective on  
711 immunometabolism. *Science*. 2019;363:doi 10.1126/science.aar3932. Epub  
712 2019/01/12. doi: 10.1126/science.aar3932. PubMed PMID: 30630899.
- 713 37. Moret Y, Schmid-Hempel P. Survival for immunity: the price of immune  
714 system activation for bumblebee workers. *Science*. 2000;290(5494):1166-8. Epub  
715 2000/11/10. doi: 8972 [pii]. PubMed PMID: 11073456.
- 716 38. Ghesquiere B, Wong BW, Kuchnio A, Carmeliet P. Metabolism of stromal and  
717 immune cells in health and disease. *Nature*. 2014;511(7508):167-76. Epub  
718 2014/07/11. doi: 10.1038/nature13312. PubMed PMID: 25008522.
- 719 39. Nilsson R, Jain M. Simultaneous tracing of carbon and nitrogen isotopes in  
720 human cells. *Mol Biosyst*. 2016;12(6):1929-37. Epub 2016/04/22. doi:  
721 10.1039/c6mb00009f. PubMed PMID: 27098229; PubMed Central PMCID:  
722 PMC4879607.
- 723 40. McCarville JL, Ayres JS. Disease tolerance: concept and mechanisms. *Curr*  
724 *Opin Immunol*. 2017;50:88-93. Epub 2017/12/19. doi: 10.1016/j.coi.2017.12.003.  
725 PubMed PMID: 29253642.
- 726 41. Soares MP, Teixeira L, Moita LF. Disease tolerance and immunity in host  
727 protection against infection. *Nat Rev Immunol*. 2017;17(2):83-96. Epub 2017/01/04.  
728 doi: 10.1038/nri.2016.136. PubMed PMID: 28044057.
- 729 42. Turner ML, Cronin JG, Noleto PG, Sheldon IM. Glucose availability and AMP-  
730 activated protein kinase link energy metabolism and innate immunity in the bovine  
731 endometrium. *PLoS ONE*. 2016;11:e0151416. Epub 2016/03/15. doi:  
732 10.1371/journal.pone.0151416. PubMed PMID: 26974839; PubMed Central PMCID:  
733 PMC4790959.

- 734 43. Noleto PG, Saut JP, Sheldon IM. Short communication: Glutamine modulates  
735 inflammatory responses to lipopolysaccharide in ex vivo bovine endometrium. J  
736 Dairy Sci. 2017;100:2207-12. Epub 2017/01/23. doi: 10.3168/jds.2016-12023.  
737 PubMed PMID: 28109606.
- 738 44. Giddings KS, Johnson AE, Tweten RK. Redefining cholesterol's role in the  
739 mechanism of the cholesterol-dependent cytolysins. PNAS. 2003;100(20):11315-  
740 220. Epub 2003/09/23. doi: 10.1073/pnas.2033520100. PubMed PMID: 14500900;  
741 PubMed Central PMCID: PMC208754.
- 742 45. Zhang J, Pavlova NN, Thompson CB. Cancer cell metabolism: the essential  
743 role of the nonessential amino acid, glutamine. EMBO J. 2017;36(10):1302-15. Epub  
744 2017/04/20. doi: 10.15252/emboj.201696151. PubMed PMID: 28420743.
- 745 46. Inoue J, Ito Y, Shimada S, Satoh SI, Sasaki T, Hashidume T, et al. Glutamine  
746 stimulates the gene expression and processing of sterol regulatory element binding  
747 proteins, thereby increasing the expression of their target genes. FEBS J.  
748 2011;278(15):2739-50. Epub 2011/06/24. doi: 10.1111/j.1742-4658.2011.08204.x.  
749 PubMed PMID: 21696544.
- 750 47. Preta G, Jankunec M, Heinrich F, Griffin S, Sheldon IM, Valincius G. Tethered  
751 bilayer membranes as a complementary tool for functional and structural studies:  
752 The pyolysin case. Biochim Biophys Acta. 2016;1858(9):2070-80. Epub 2016/05/24.  
753 doi: 10.1016/j.bbamem.2016.05.016. PubMed PMID: 27211243.
- 754 48. Cronin JG, Turner ML, Goetze L, Bryant CE, Sheldon IM. Toll-Like receptor 4  
755 and MyD88-dependent signaling mechanisms of the innate immune system are  
756 essential for the response to lipopolysaccharide by epithelial and stromal cells of the  
757 bovine endometrium. Biol Reprod. 2012;86:51, 1-9. Epub 2011/11/05. doi:  
758 10.1095/biolreprod.111.092718. PubMed PMID: 22053092.



759 49. Turner ML, Cronin JC, Healey GD, Sheldon IM. Epithelial and stromal cells of  
760 bovine endometrium have roles in innate immunity and initiate inflammatory  
761 responses to bacterial lipopeptides in vitro via Toll-like receptors TLR2, TLR1 and  
762 TLR6. *Endocrinology*. 2014;155:1453-65. doi: 10.1210/en.2013-1822. PubMed  
763 PMID: 24437488 PubMed Central PMCID: PMC3959608.

764 50. Billington SJ, Jost BH, Cuevas WA, Bright KR, Songer JG. The  
765 *Arcanobacterium* (*Actinomyces*) *pyogenes* hemolysin, pyolysin, is a novel member of  
766 the thiol-activated cytolysin family. *J Bacteriol*. 1997;179(19):6100-6. doi:  
767 10.1128/jb.179.19.6100-6106. PubMed PMID: 9324258.

768 51. Griffin S, Preta G, Sheldon IM. Inhibiting mevalonate pathway enzymes  
769 increases stromal cell resilience to a cholesterol-dependent cytolysin. *Sci Rep*.  
770 2017;7(1):17050. doi: 10.1038/s41598-017-17138-y. PubMed PMID: 29213055;  
771 PubMed Central PMCID: PMC5719056.

772

### 773 **Supporting information**

774 **SI Fig 1. Similar cell growth curves irrespective of glutamine supply for**  
775 **HeLa cells cultured with serum.** HeLa cells were cultured in medium containing  
776 10% fetal calf serum and 2 mM glutamine for 24 h, and then with or without 2 mM  
777 glutamine for a further 72 h. Cell viability was measured using the MTT assay every  
778 24 h. The data are reported as mean (SEM) from 4 independent passages. Data  
779 were analyzed by 2-way ANOVA; there was a significant effect of time ( $F_{(3, 24)} =$   
780  $113.6$ ,  $P < 0.0001$ ) but not for glutamine ( $F_{(1, 24)} = 0.0005$ ,  $P = 0.98$ ) or the interaction  
781 of time x glutamine ( $F_{(3, 24)} = 0.5$ ,  $P = 0.71$ ).

**A**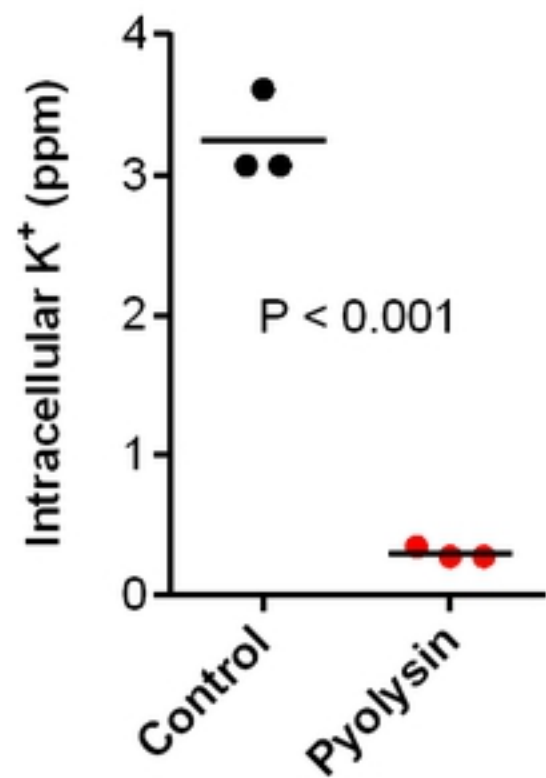**B**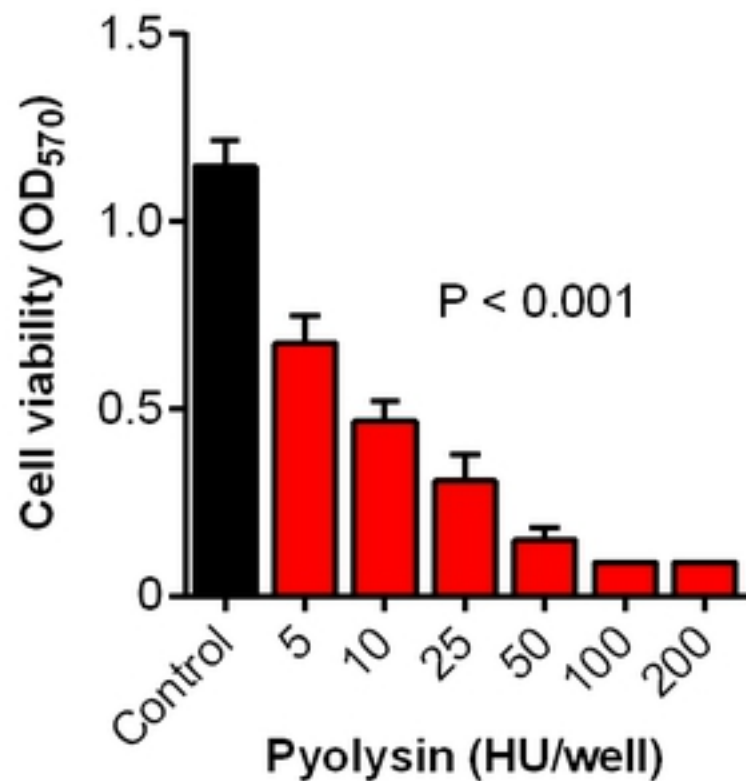**C**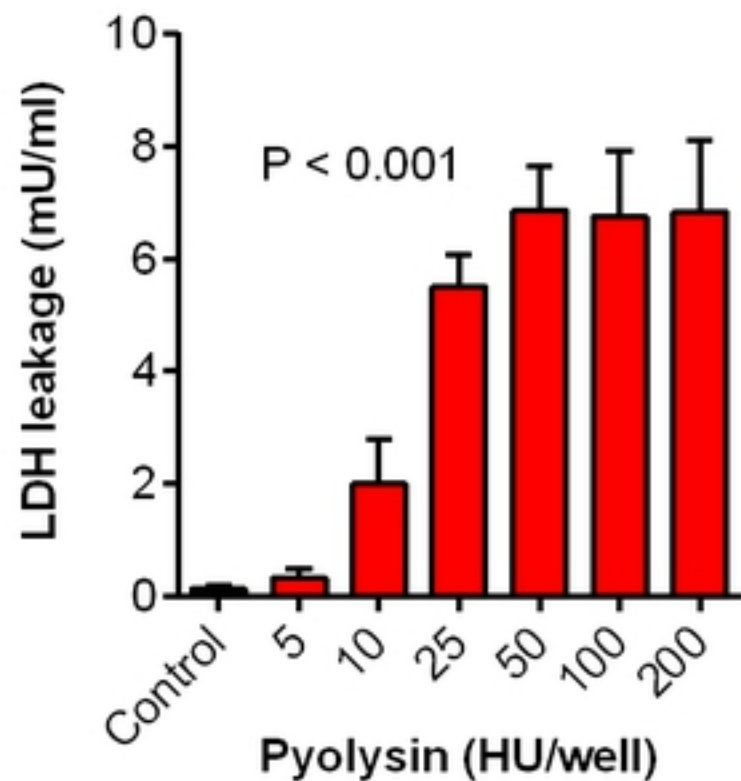

Figure 1



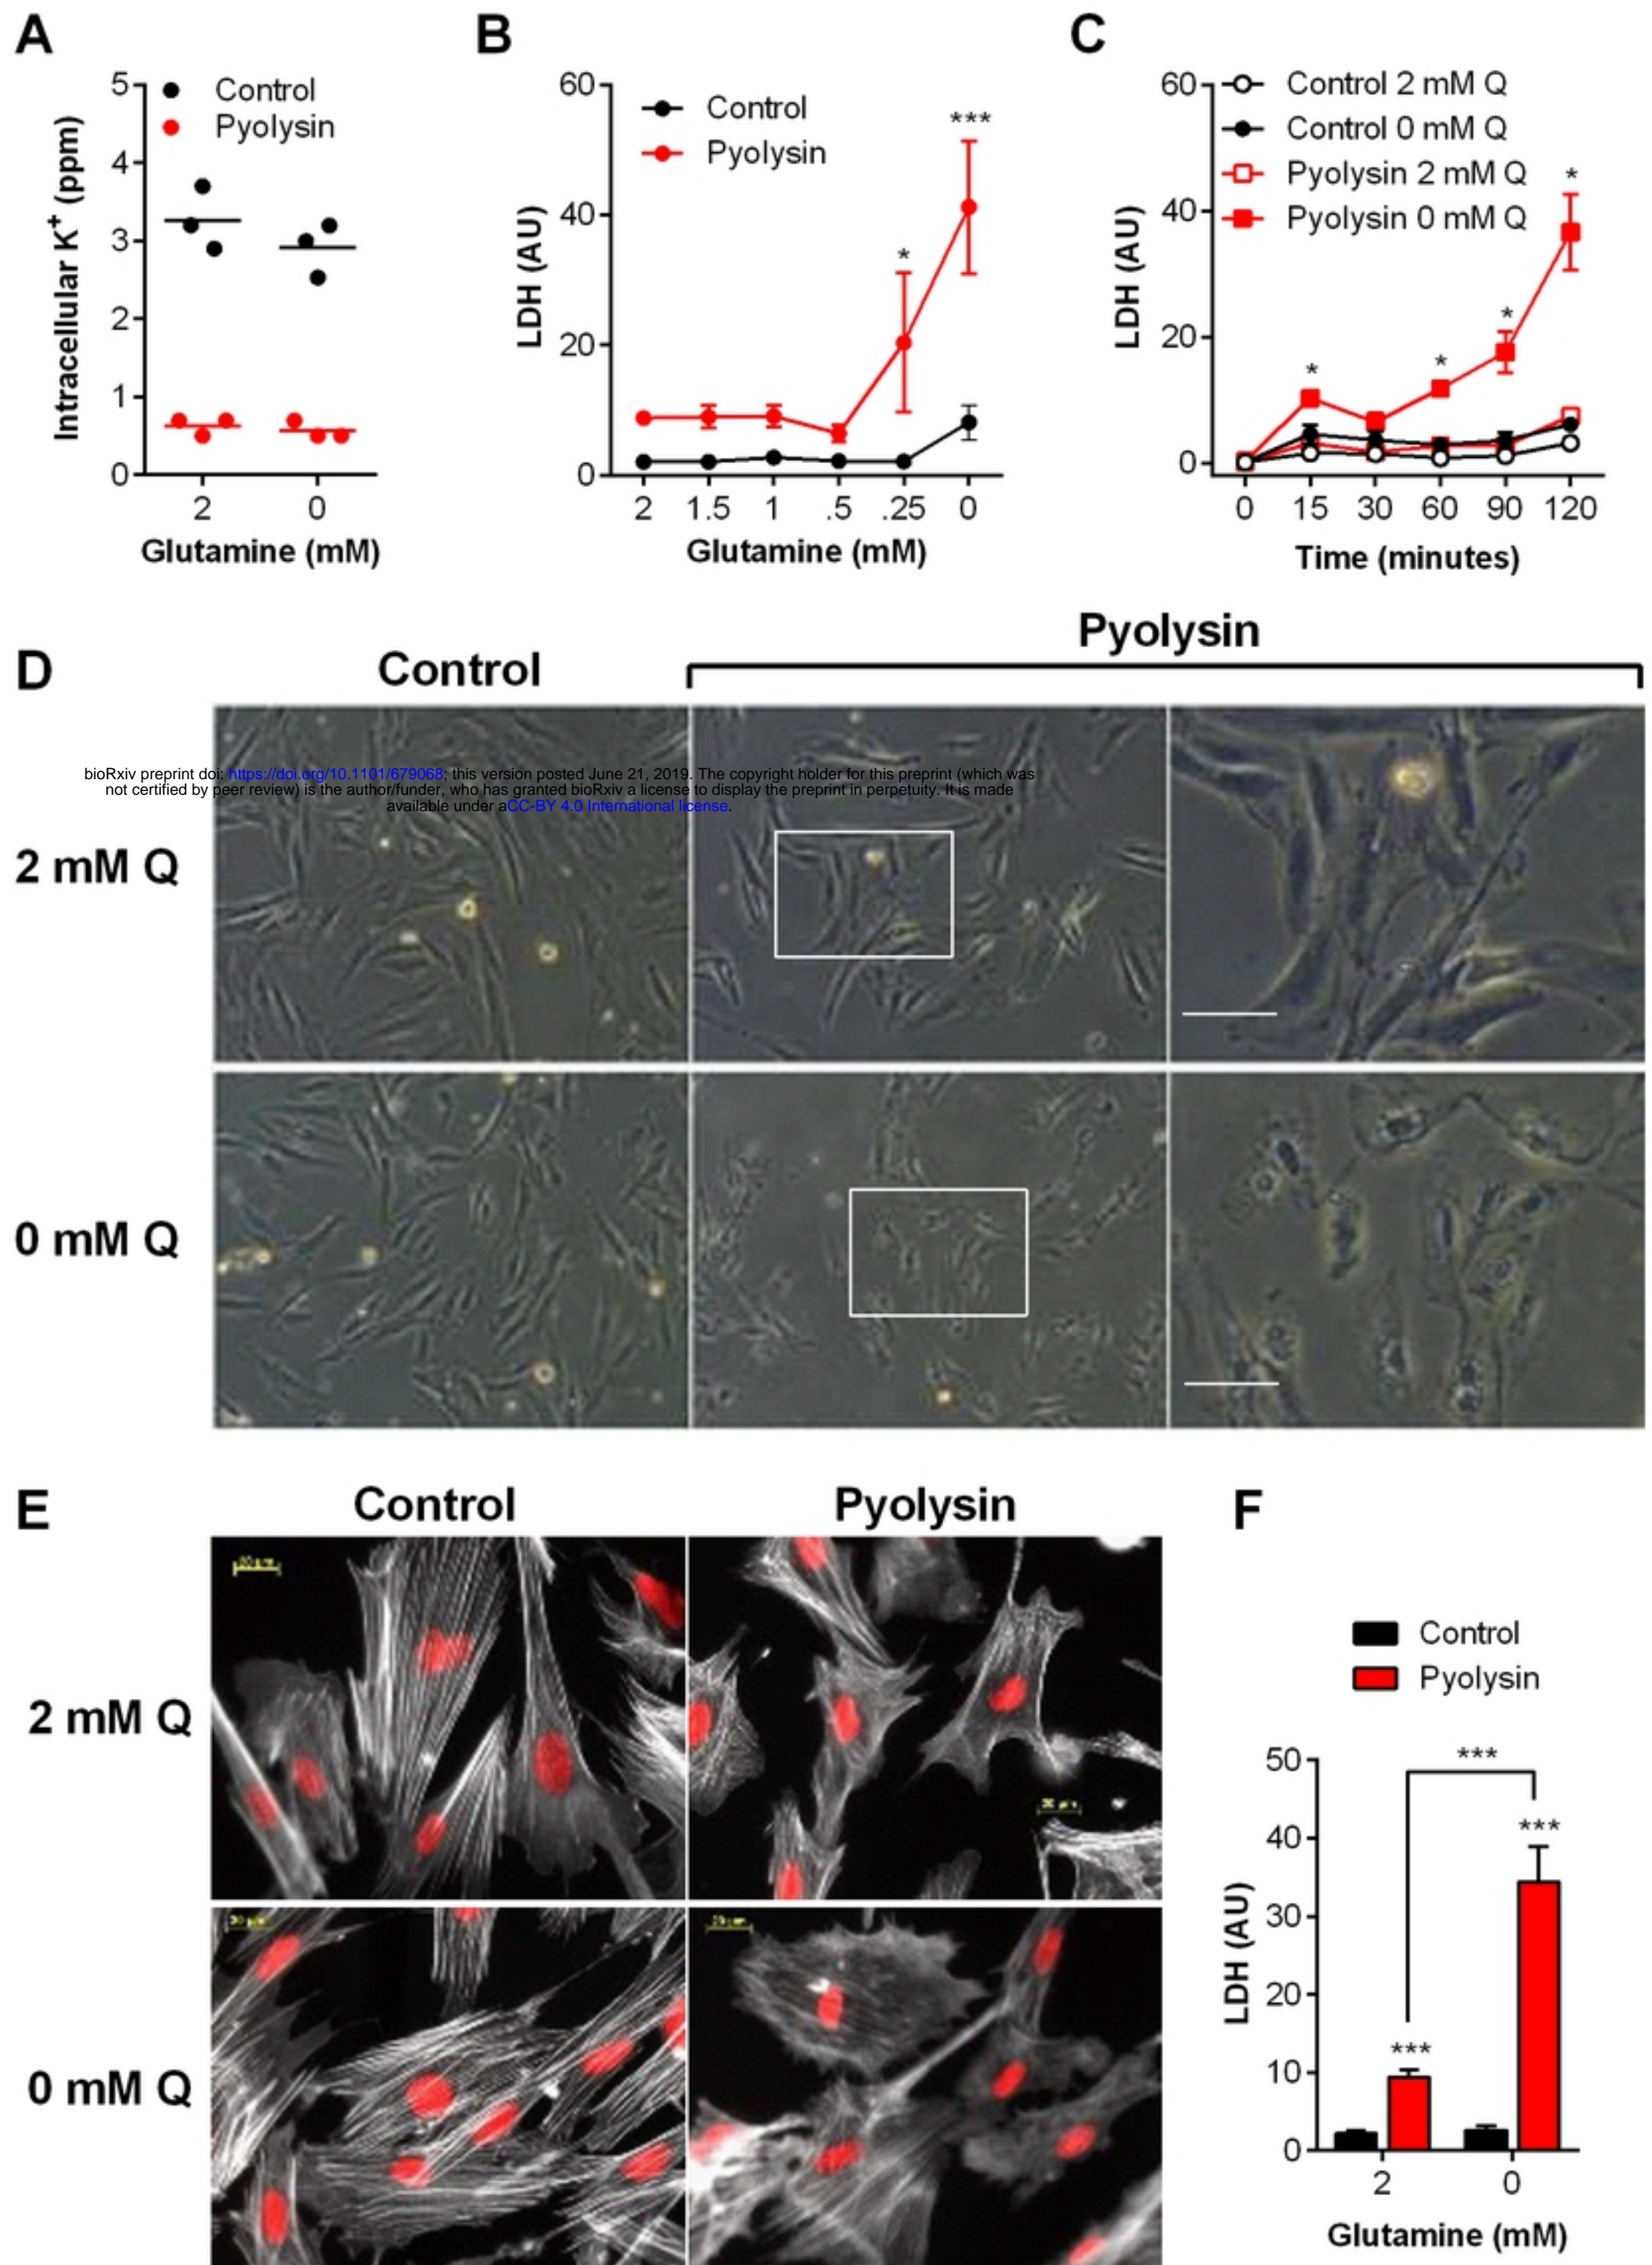

**A**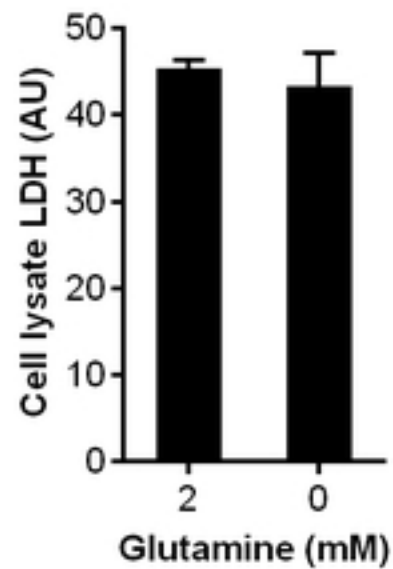**B**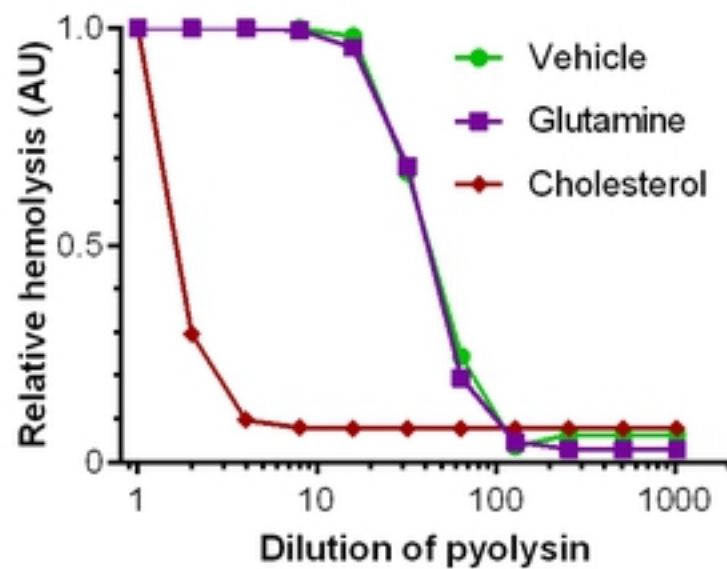**C**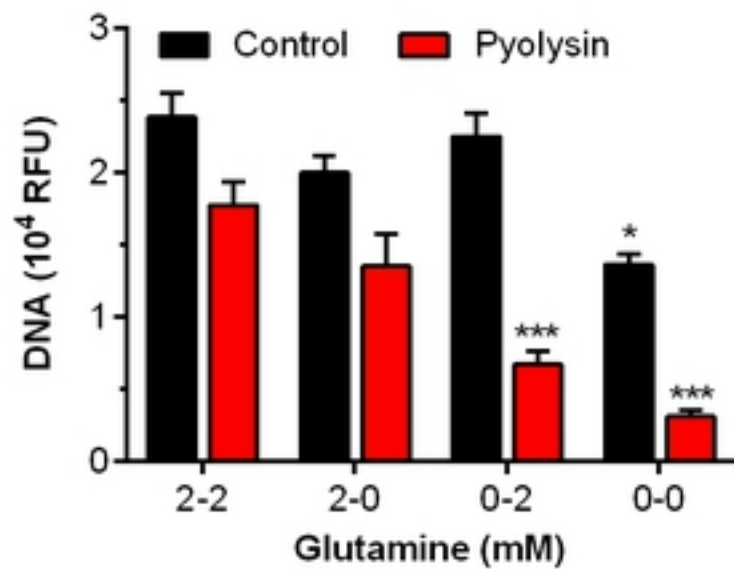**Figure 3**



**A**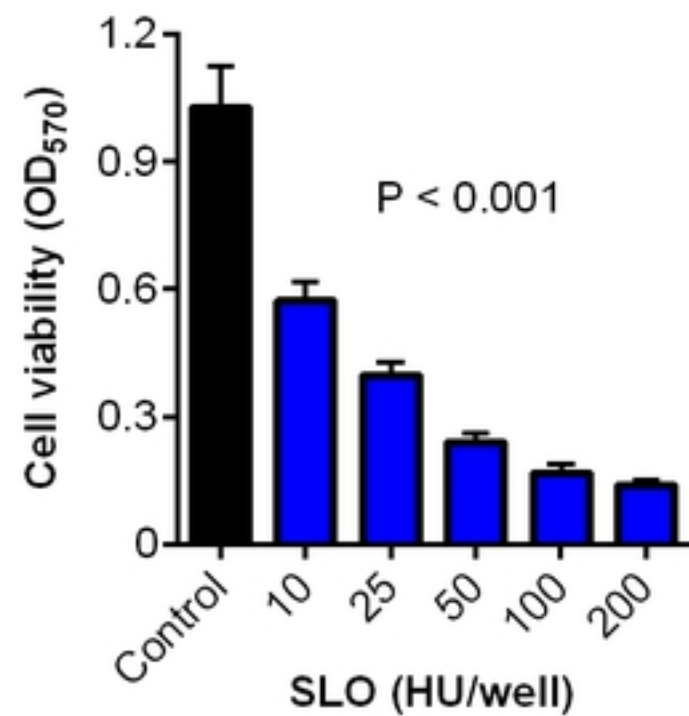**B**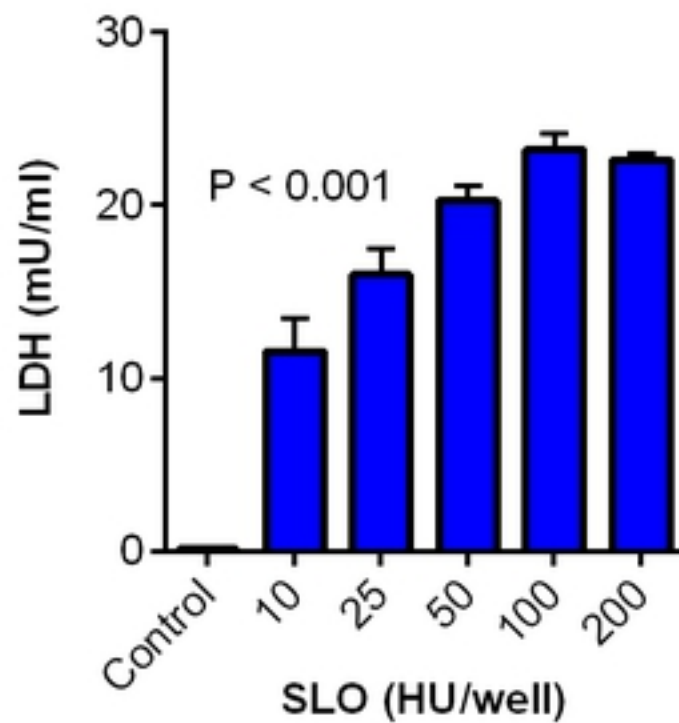**C**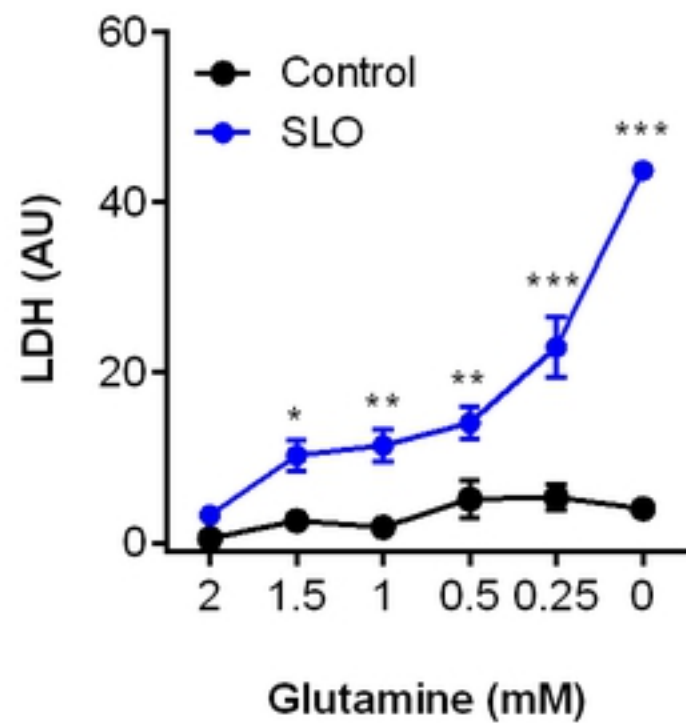

Figure 4

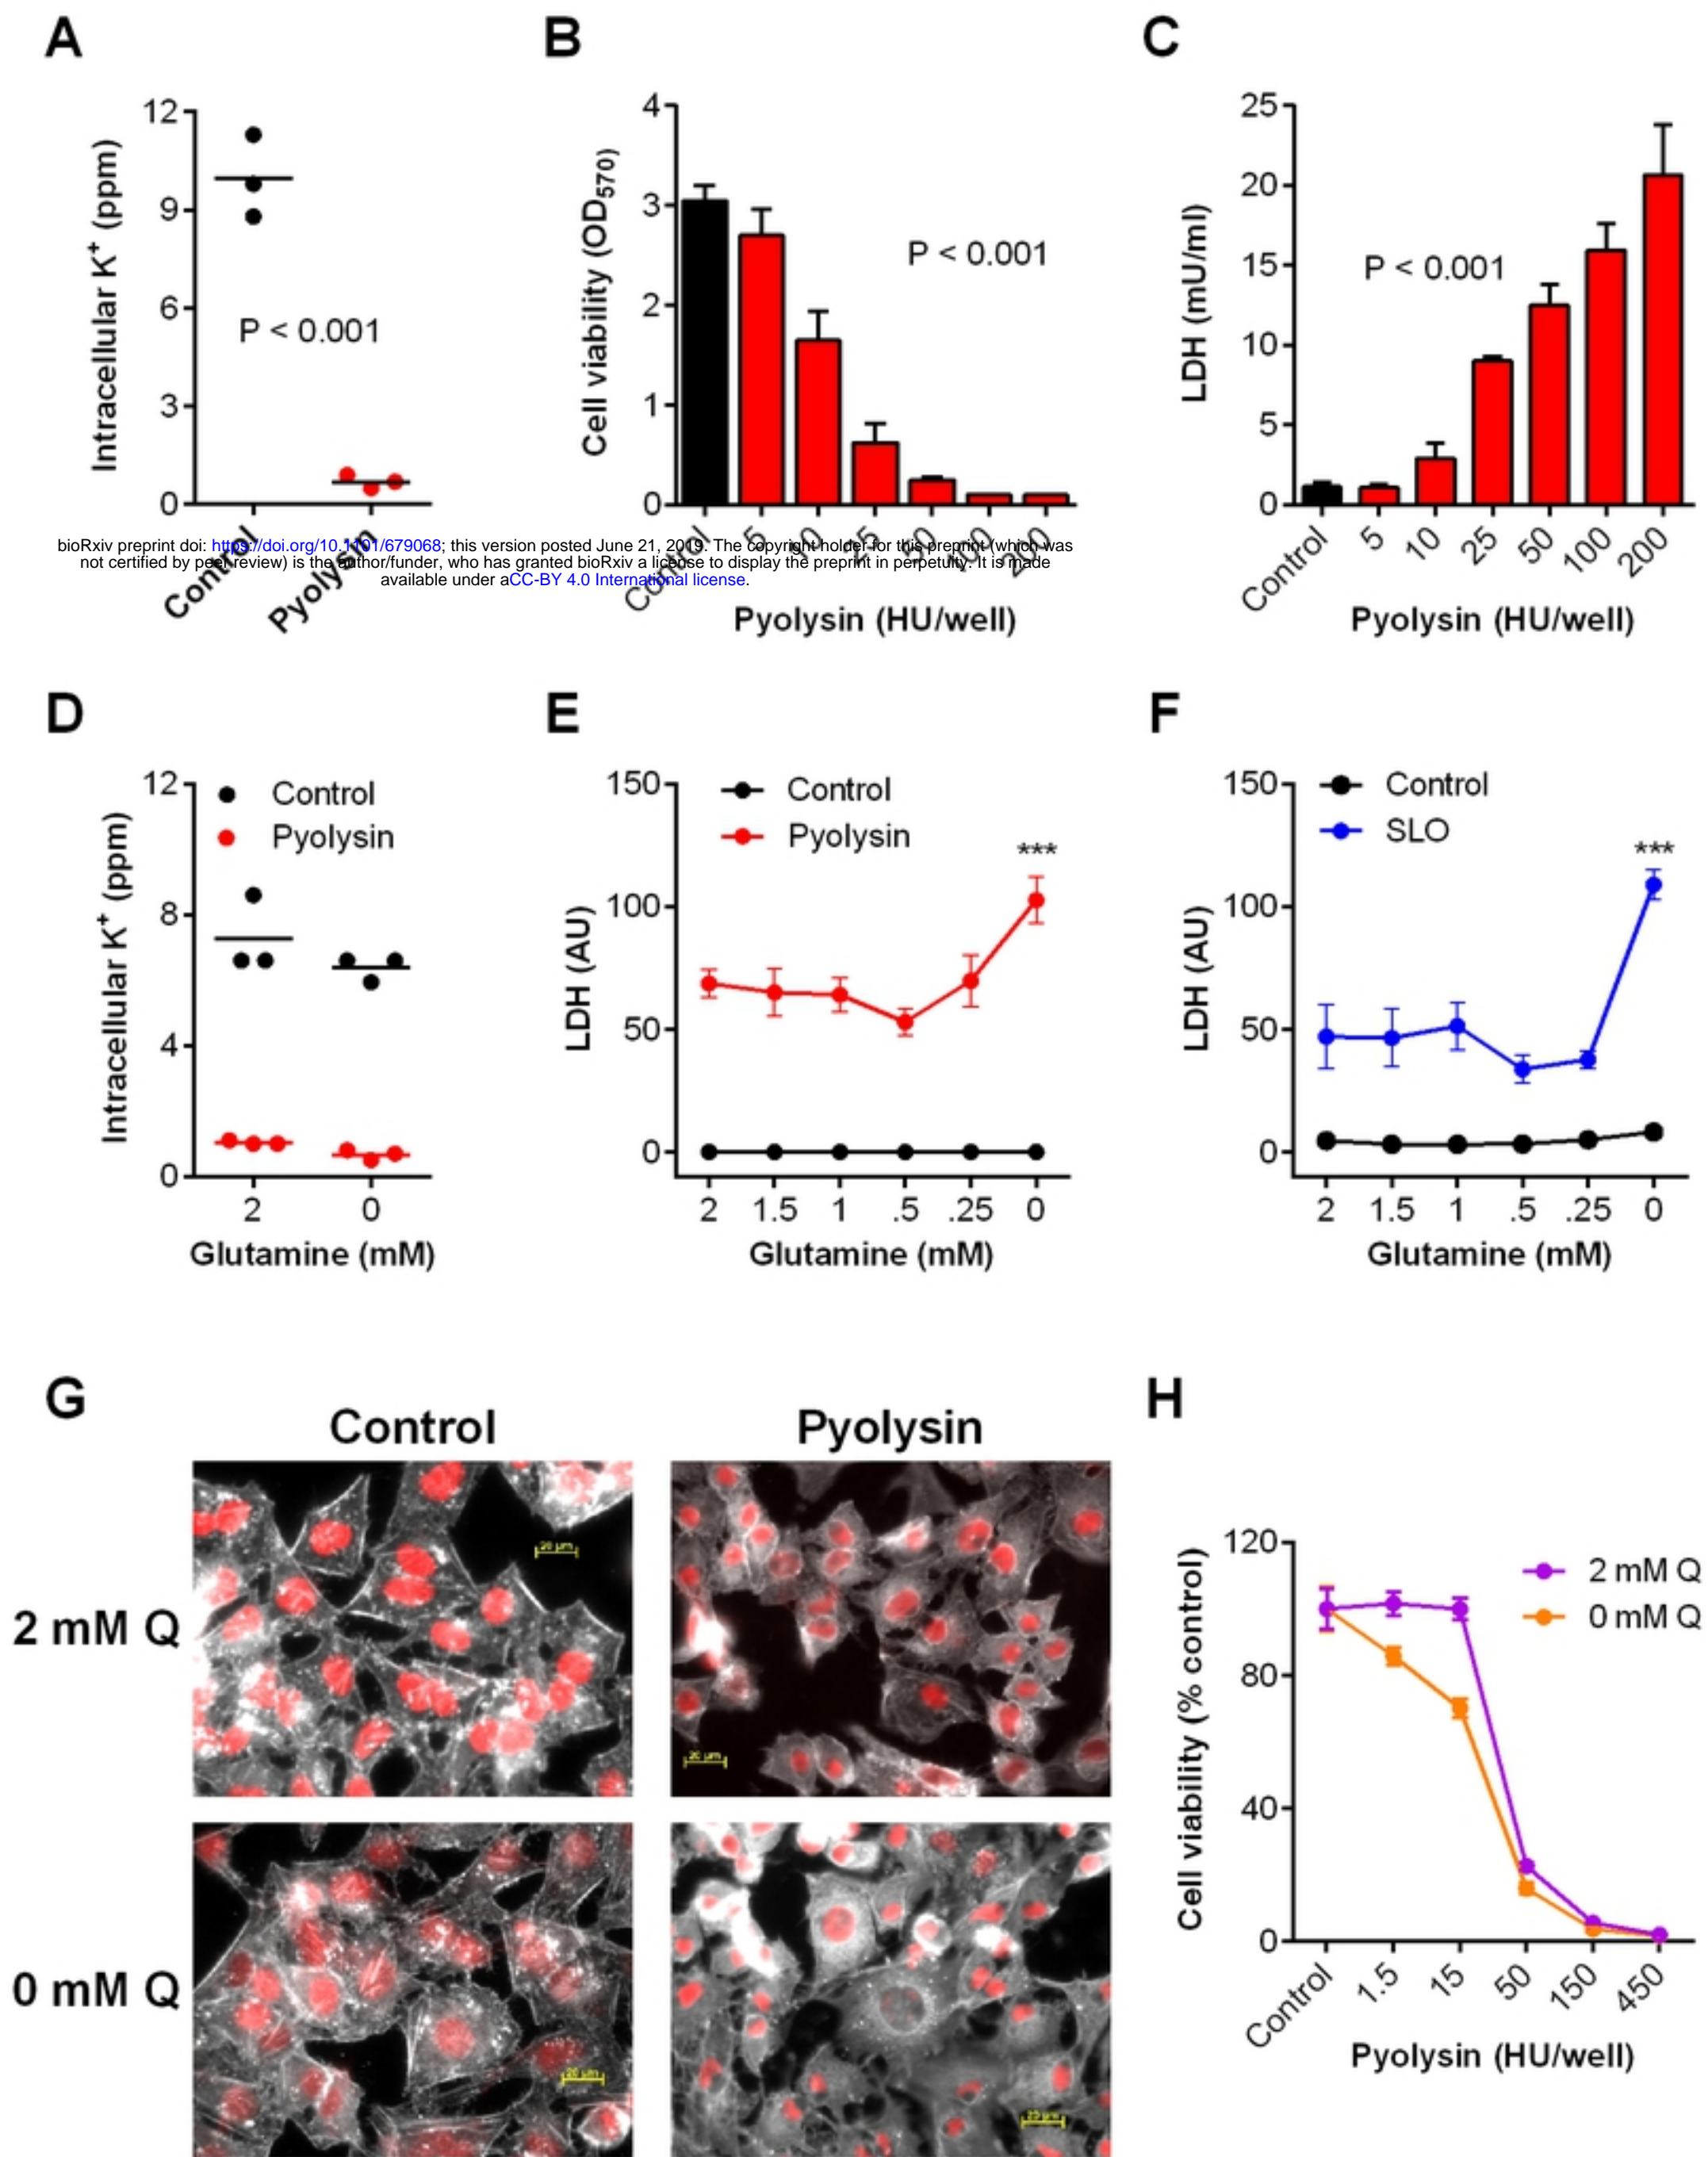

bioRxiv preprint doi: <https://doi.org/10.1101/679068>; this version posted June 21, 2019. The copyright holder for this preprint (which was not certified by peer review) is the author/funder, who has granted bioRxiv a license to display the preprint in perpetuity. It is made available under aCC-BY 4.0 International license.

Figure 5

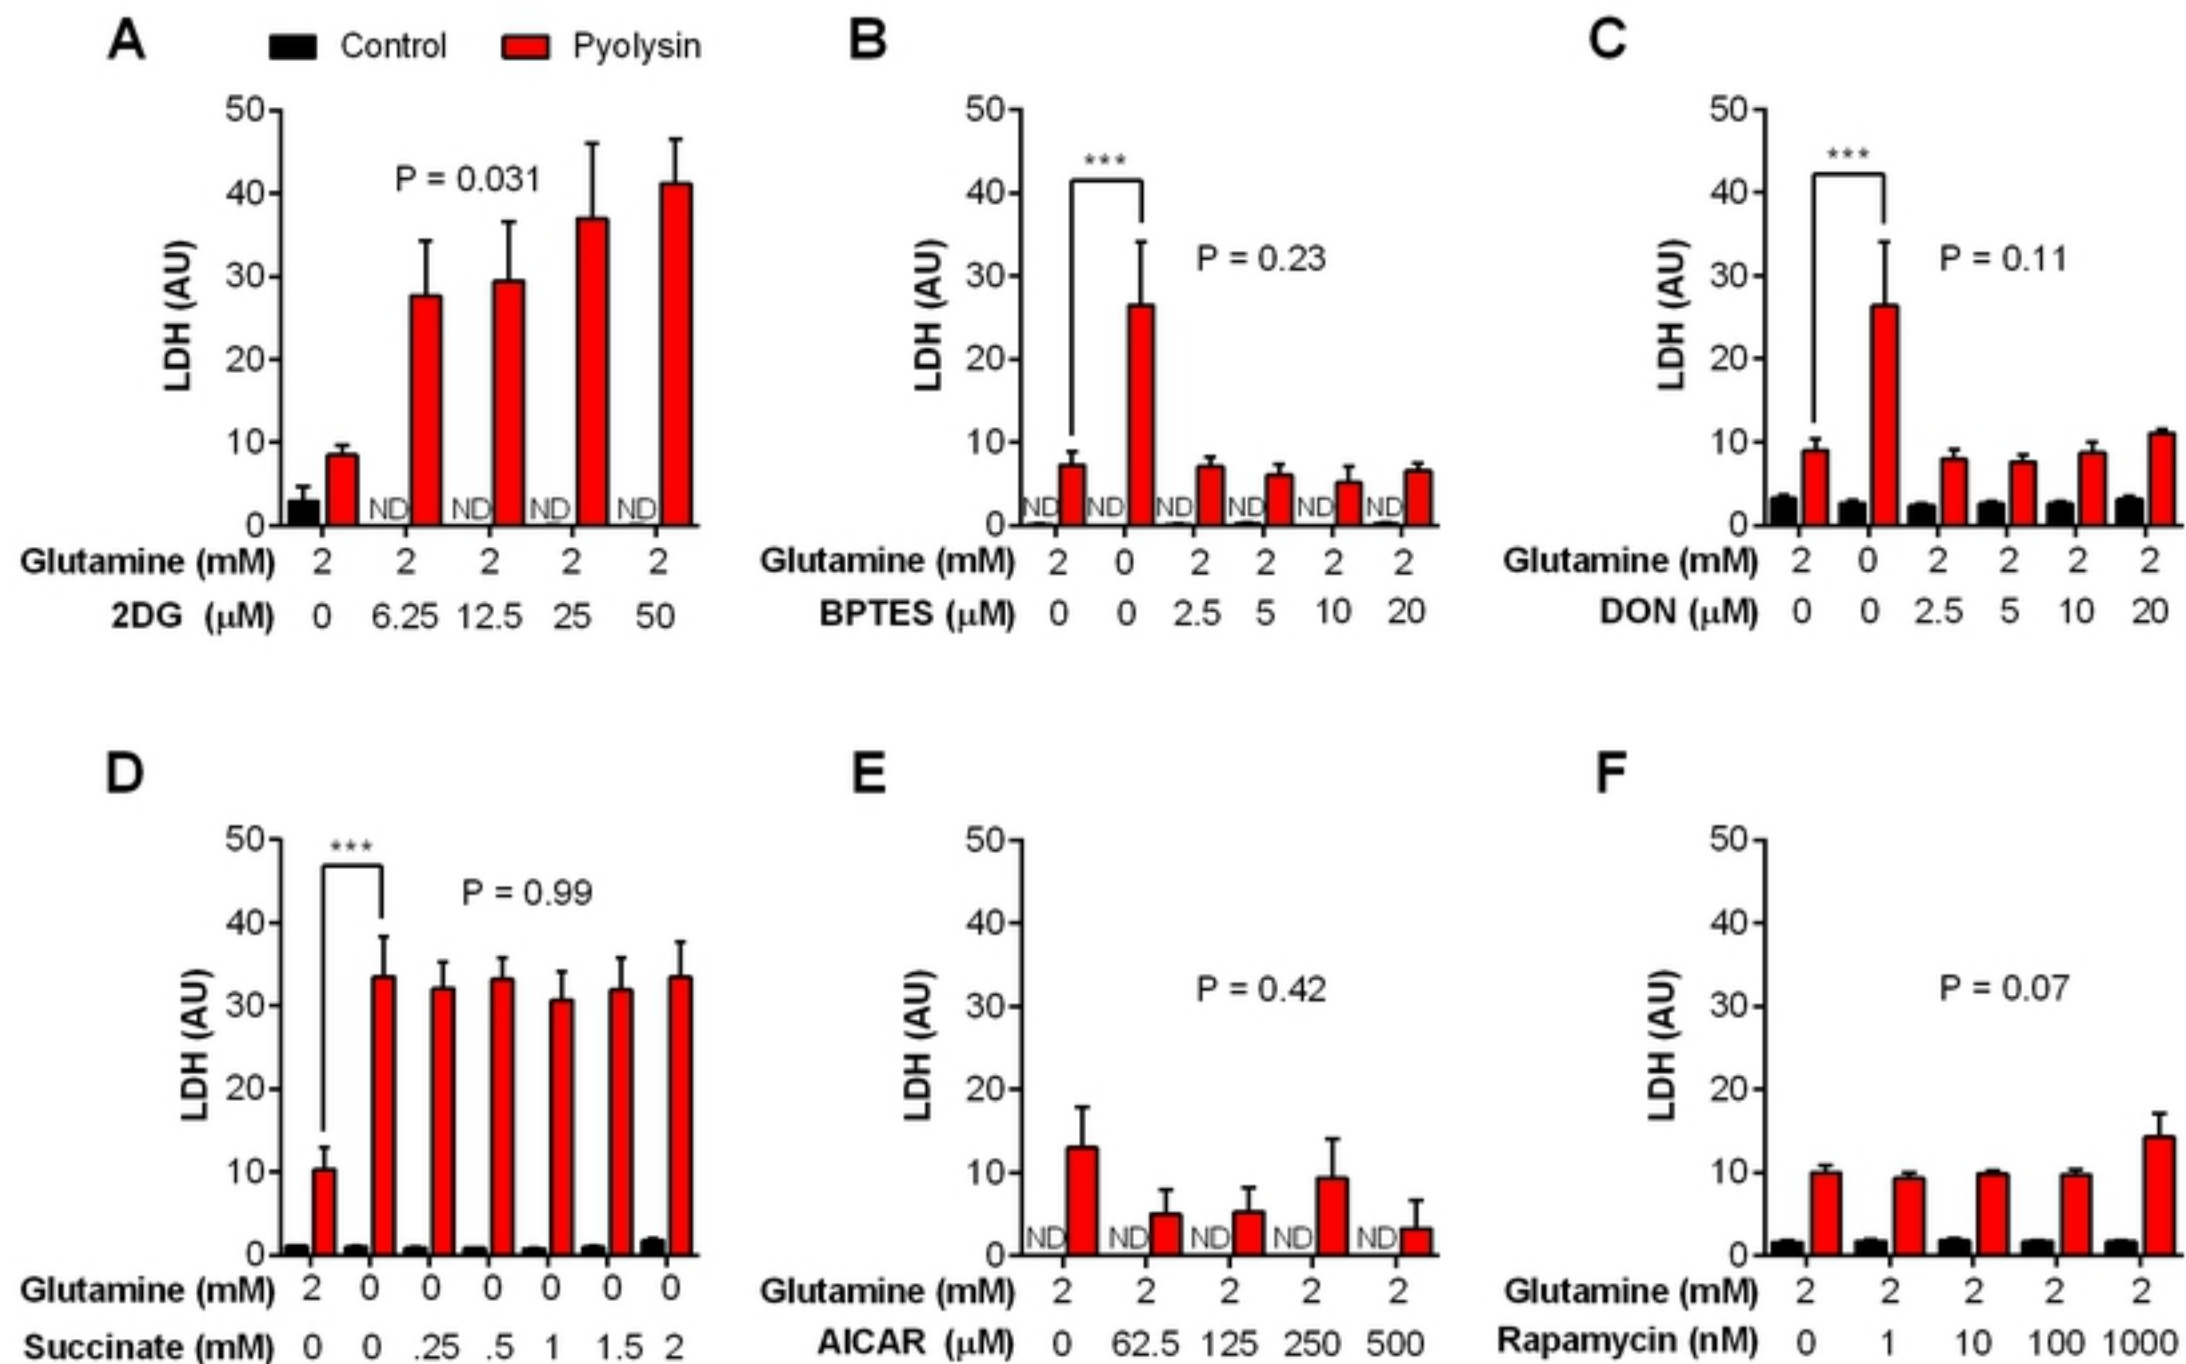

Figure 6

**A**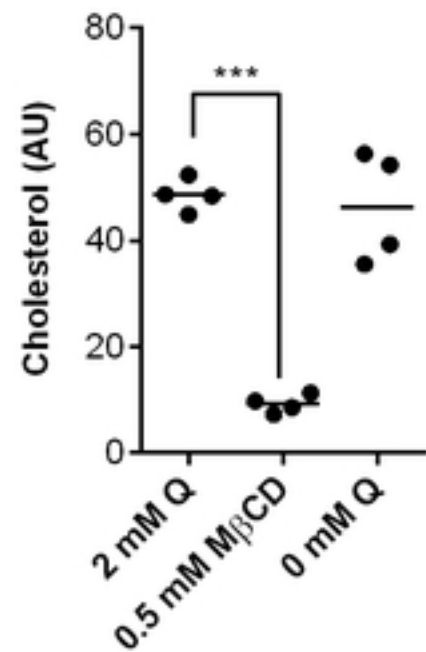**B**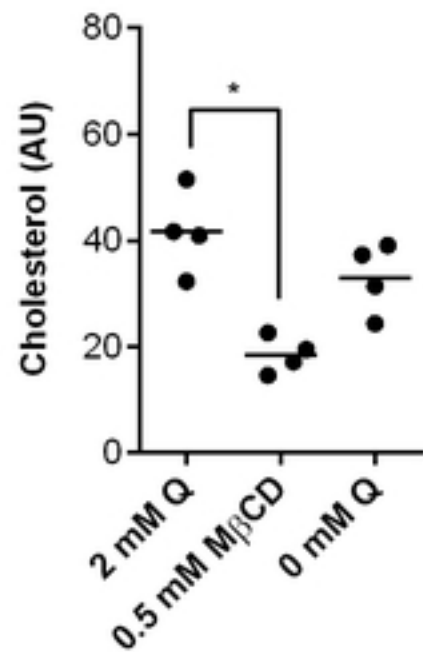**C**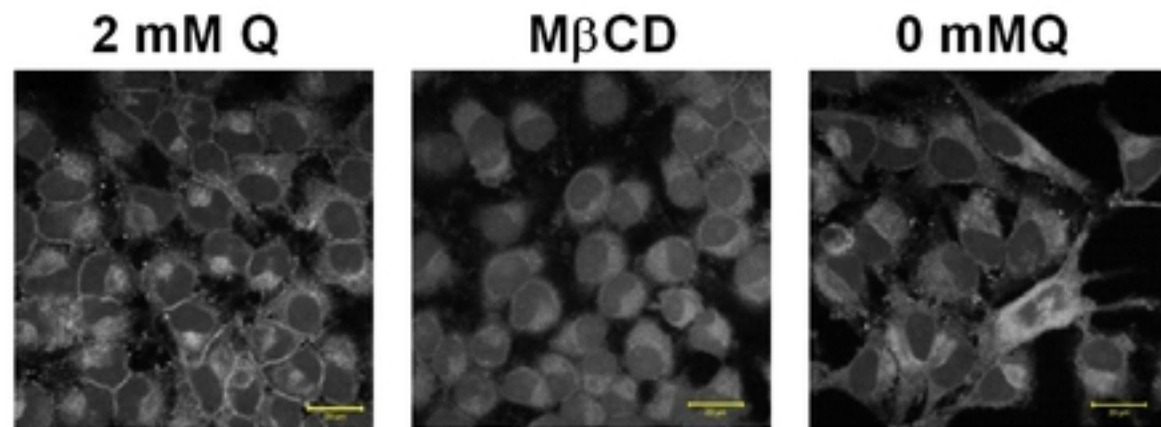

Figure 7
